# Supplementary material for: Revisiting the Taxonomic Status of the Biomedically and Industrially Important Genus Amycolatopsis, Using a Phylogenomic Approach
Source: Front Microbiol. 2018 Sep 27;9:2281. doi: 10.3389/fmicb.2018.02281 (PMC6171478; doi:10.3389/fmicb.2018.02281)
Supplement: Supplementary file 4 [file Table_4.XLSX]

## Sheet: S4A
Supplementary Table 4A. Genes specific to Group A
Function	1	2	3	4	5	6	7	8	9	10	11	12	13	14	15	16	17	18	19
hypothetical protein	aal1_00057	aaz3_07006	aaz4_08568	aco7_03978	ade8_04309	aja10_05742	ake13_08474	ake12_03649	ake14_05026	alu15_01591	alu16_07222	aor28_02289	aor32_02199	aor29_07547	are36_02647	are34_07693	are35_02782	as42_04278	as45_05300
Soluble aldose sugar dehydrogenase YliI precursor	aal1_00061	aaz3_07010	aaz4_08564	aco7_03977	ade8_04305	aja10_05743	ake13_08473	ake12_03650	ake14_05025	alu15_01592	alu16_07221	aor28_02288	aor32_02198	aor29_07546	are36_02646	are34_07692	are35_02783	as42_04277	as45_05299
aminoalkylphosphonic acid N-acetyltransferase	aal1_00284	aaz3_03984	aaz4_05854	aco7_03733	ade8_07004	aja10_05960	ake13_02844	ake12_03862	ake14_05427	alu15_01807	alu16_04298	aor28_06378	aor32_01982	aor29_07250	are36_04723	are34_00464	are35_03851	as42_04052	as45_07886
N-acetylglucosamine repressor	aal1_00343	aaz3_02078	aaz4_05800	aco7_03663	ade8_06957	aja10_06008	ake13_02899	ake12_03919	ake14_05370	alu15_01860	alu16_04245	aor28_06450	aor32_01917	aor29_07200	are36_04668	are34_00519	are35_03906	as42_04003	as45_07983
Transcriptional regulatory protein EmbR	aal1_00359	aaz3_02093	aaz4_05785	aco7_03650	ade8_06940	aja10_06027	ake13_02918	ake12_03938	ake14_07347	alu15_01879	alu16_04226	aor28_06475	aor32_01898	aor29_01686	are36_04618	are34_00537	are35_03924	as42_03986	as45_08000
hypothetical protein	aal1_00370	aaz3_02104	aaz4_05774	aco7_03639	ade8_06929	aja10_06038	ake13_02929	ake12_03949	ake14_07358	alu15_01890	alu16_04215	aor28_06487	aor32_01887	aor29_01698	are36_04629	are34_00548	are35_03935	as42_03975	as45_08011
hypothetical protein	aal1_00371	aaz3_02105	aaz4_05773	aco7_03638	ade8_06928	aja10_06039	ake13_02930	ake12_03950	ake14_07359	alu15_01891	alu16_04214	aor28_06488	aor32_01886	aor29_01699	are36_04630	are34_00549	are35_03936	as42_03974	as45_08012
hypothetical protein	aal1_00372	aaz3_02107	aaz4_05771	aco7_03637	ade8_06927	aja10_06040	ake13_02932	ake12_03952	ake14_07361	alu15_01893	alu16_04212	aor28_06490	aor32_01884	aor29_01701	are36_04632	are34_00551	are35_03938	as42_03973	as45_08014
hypothetical protein	aal1_00393	aaz3_02128	aaz4_05750	aco7_03616	ade8_06905	aja10_06061	ake13_05317	ake12_03973	ake14_07382	alu15_01914	alu16_04191	aor28_06511	aor32_01863	aor29_01722	are36_04652	are34_00571	are35_03958	as42_03952	as45_08036
hypothetical protein	aal1_00397	aaz3_02132	aaz4_05746	aco7_03612	ade8_06901	aja10_06065	ake13_05321	ake12_03977	ake14_07386	alu15_01918	alu16_04187	aor28_06515	aor32_01859	aor29_01726	are36_04656	are34_00575	are35_03962	as42_03948	as45_08040
Argininosuccinate synthase	aal1_00405	aaz3_05787	aaz4_06555	aco7_05898	ade8_00068	aja10_02840	ake13_07641	ake12_00724	ake14_07959	alu15_07258	alu16_07202	aor28_05040	aor32_05127	aor29_04910	are36_06171	are34_05598	are35_03846	as42_08460	as45_07006
hypothetical protein	aal1_00465	aaz3_04344	aaz4_00990	aco7_05955	ade8_00130	aja10_02780	ake13_01446	ake12_00668	ake14_07761	alu15_07199	alu16_07143	aor28_05101	aor32_05187	aor29_04967	are36_06115	are34_05654	are35_03790	as42_08400	as45_06947
hypothetical protein	aal1_00466	aaz3_04345	aaz4_00989	aco7_05956	ade8_00131	aja10_02779	ake13_01445	ake12_00667	ake14_07760	alu15_07198	alu16_07142	aor28_05102	aor32_05188	aor29_04968	are36_06114	are34_05655	are35_03789	as42_08399	as45_06946
hypothetical protein	aal1_00469	aaz3_04348	aaz4_00986	aco7_05960	ade8_00134	aja10_02776	ake13_01442	ake12_00664	ake14_07757	alu15_07195	alu16_07139	aor28_05104	aor32_05191	aor29_04971	are36_06111	are34_05658	are35_03786	as42_08396	as45_06943
Glyoxalase-like domain protein	aal1_00481	aaz3_04359	aaz4_00975	aco7_05969	ade8_00144	aja10_02765	ake13_01431	ake12_00654	ake14_00698	alu15_07186	alu16_08418	aor28_05112	aor32_05201	aor29_04980	are36_06102	are34_05667	are35_01787	as42_08385	as45_06932
hypothetical protein	aal1_00566	aaz3_04428	aaz4_00906	aco7_06048	ade8_00201	aja10_02699	ake13_01368	ake12_00591	ake14_00635	alu15_07118	alu16_05145	aor28_05176	aor32_05267	aor29_05046	are36_04969	are34_01162	are35_00245	as42_08318	as45_06871
hypothetical protein	aal1_00590	aaz3_04452	aaz4_00882	aco7_06069	ade8_03457	aja10_02675	ake13_01343	ake12_00566	ake14_00610	alu15_07092	alu16_05171	aor28_05196	aor32_05292	aor29_05076	are36_04953	are34_01178	are35_00229	as42_07953	as45_06843
hypothetical protein	aal1_00598	aaz3_04460	aaz4_00874	aco7_06077	ade8_03450	aja10_02667	ake13_01335	ake12_00558	ake14_00602	alu15_07085	alu16_05178	aor28_05203	aor32_05301	aor29_05082	are36_04945	are34_01186	are35_00221	as42_07945	as45_06837
hypothetical protein	aal1_00600	aaz3_04462	aaz4_00872	aco7_06079	ade8_03448	aja10_02665	ake13_01333	ake12_00556	ake14_00600	alu15_07083	alu16_05180	aor28_05205	aor32_05303	aor29_05084	are36_03331	are34_04790	are35_00553	as42_07943	as45_06835
Prenyltransferase and squalene oxidase repeat protein	aal1_00602	aaz3_04463	aaz4_00871	aco7_06080	ade8_03447	aja10_02664	ake13_01332	ake12_00555	ake14_00599	alu15_07082	alu16_05181	aor28_05206	aor32_05304	aor29_05085	are36_03330	are34_04789	are35_00554	as42_07942	as45_06834
Regulatory protein AfsR	aal1_00985	aaz3_02513	aaz4_04098	aco7_05834	ade8_02148	aja10_02353	ake13_07205	ake12_00236	ake14_05139	alu15_06721	alu16_06901	aor28_05482	aor32_05624	aor29_08145	are36_03660	are34_06213	are35_02721	as42_07617	as45_06554
hypothetical protein	aal1_00994	aaz3_02521	aaz4_04106	aco7_05831	ade8_02141	aja10_02343	ake13_07196	ake12_00226	ake14_05129	alu15_06712	alu16_08266	aor28_05489	aor32_05634	aor29_08152	are36_03668	are34_06221	are35_02713	as42_07607	as45_06546
Single-stranded DNA-binding protein	aal1_00999	aaz3_02527	aaz4_04112	aco7_05816	ade8_02136	aja10_02338	ake13_07191	ake12_00221	ake14_05124	alu15_06707	alu16_08261	aor28_05494	aor32_05639	aor29_08157	are36_03673	are34_06226	are35_02708	as42_07602	as45_06541
hypothetical protein	aal1_01046	aaz3_02572	aaz4_04157	aco7_05772	ade8_02099	aja10_02297	ake13_07151	ake12_00179	ake14_03362	alu15_06665	alu16_06338	aor28_05542	aor32_05678	aor29_08223	are36_03719	are34_06272	are35_02662	as42_07563	as45_06500
Plasmid pRiA4b ORF-3-like protein	aal1_01233	aaz3_06601	aaz4_07194	aco7_03275	ade8_04968	aja10_02114	ake13_00049	ake12_08868	ake14_07471	alu15_06447	alu16_03058	aor28_05734	aor32_05862	aor29_05131	are36_01465	are34_03684	are35_06656	as42_07965	as45_05118
Deazaflavin-dependent nitroreductase	aal1_01234	aaz3_06600	aaz4_07195	aco7_03276	ade8_04969	aja10_02113	ake13_00050	ake12_08867	ake14_07472	alu15_06446	alu16_03057	aor28_05735	aor32_05863	aor29_05132	are36_01463	are34_03682	are35_06654	as42_07966	as45_05117
hypothetical protein	aal1_01318	aaz3_02337	aaz4_03779	aco7_03360	ade8_05051	aja10_02026	ake13_00135	ake12_08781	ake14_07558	alu15_06363	alu16_02974	aor28_05822	aor32_05949	aor29_05214	are36_01382	are34_03601	are35_06573	as42_08052	as45_05033
Alkaline phosphatase D precursor	aal1_01330	aaz3_02350	aaz4_03792	aco7_03372	ade8_05069	aja10_02011	ake13_00148	ake12_08770	ake14_07569	alu15_06351	alu16_02962	aor28_05840	aor32_05967	aor29_00270	are36_01368	are34_03587	are35_06559	as42_08067	as45_05019
ABC-2 family transporter protein	aal1_01438	aaz3_02449	aaz4_03891	aco7_03469	ade8_03490	aja10_01904	ake13_00269	ake12_08666	ake14_08317	alu15_06247	alu16_07005	aor28_05945	aor32_06071	aor29_00375	are36_07656	are34_04594	are35_04826	as42_08174	as45_04913
ABC-2 family transporter protein	aal1_01439	aaz3_02450	aaz4_03892	aco7_03470	ade8_03491	aja10_01903	ake13_00270	ake12_08665	ake14_08316	alu15_06246	alu16_07006	aor28_05946	aor32_06072	aor29_00376	are36_07655	are34_04595	are35_04827	as42_08175	as45_04912
hypothetical protein	aal1_01530	aaz3_04787	aaz4_06815	aco7_03563	ade8_03577	aja10_01812	ake13_00364	ake12_08571	ake14_08223	alu15_06156	alu16_07890	aor28_06033	aor32_06163	aor29_04368	are36_07557	are34_04693	are35_04926	as42_08266	as45_04827
hypothetical protein	aal1_01541	aaz3_04777	aaz4_06825	aco7_03573	ade8_03587	aja10_01799	ake13_00375	ake12_08560	ake14_08212	alu15_06146	alu16_07900	aor28_06043	aor32_06174	aor29_04358	are36_07548	are34_04702	are35_04935	as42_08277	as45_04816
hypothetical protein	aal1_01562	aaz3_04755	aaz4_06847	aco7_03594	ade8_03608	aja10_01777	ake13_00398	ake12_08537	ake14_08189	alu15_06123	alu16_06790	aor28_06064	aor32_06195	aor29_04337	are36_07528	are34_04722	are35_04955	as42_08299	as45_04795
hypothetical protein	aal1_01760	aaz3_08195	aaz4_06125	aco7_00643	ade8_03855	aja10_01556	ake13_02534	ake12_08313	ake14_00867	alu15_05630	alu16_04938	aor28_01763	aor32_06418	aor29_01087	are36_07353	are34_02283	are35_05129	as42_06923	as45_04577
hypothetical protein	aal1_01778	aaz3_08181	aaz4_06111	aco7_00631	ade8_03873	aja10_01538	ake13_02548	ake12_08299	ake14_00853	alu15_05612	alu16_04920	aor28_01748	aor32_06436	aor29_01072	are36_07341	are34_02271	are35_05141	as42_06941	as45_04563
hypothetical protein	aal1_01789	aaz3_07562	aaz4_06912	aco7_00620	ade8_03884	aja10_01527	ake13_02559	ake12_08288	ake14_00842	alu15_05601	alu16_04909	aor28_01737	aor32_06447	aor29_01061	are36_07330	are34_02260	are35_03970	as42_06952	as45_04552
Putative sugar phosphate isomerase YwlF	aal1_01851	aaz3_07132	aaz4_06348	aco7_00563	ade8_00246	aja10_01368	ake13_02624	ake12_08237	ake14_00791	alu15_05549	alu16_04857	aor28_01679	aor32_06515	aor29_00992	are36_07274	are34_02203	are35_04028	as42_07001	as45_04491
hypothetical protein	aal1_01878	aaz3_07606	aaz4_03644	aco7_00536	ade8_00272	aja10_01341	ake13_02651	ake12_08210	ake14_00764	alu15_05521	alu16_04829	aor28_01653	aor32_06542	aor29_02669	are36_07248	are34_02177	are35_04054	as42_07028	as45_04464
hypothetical protein	aal1_02161	aaz3_00612	aaz4_06953	aco7_07291	ade8_01049	aja10_01032	ake13_05525	ake12_07603	ake14_01965	alu15_05214	alu16_00486	aor28_01353	aor32_06893	aor29_02550	are36_04516	are34_03436	are35_01415	as42_07334	as45_04130
hypothetical protein	aal1_02302	aaz3_03033	aaz4_03586	aco7_07158	ade8_00912	aja10_00885	ake13_06657	ake12_07462	ake14_02106	alu15_05076	alu16_00624	aor28_01211	aor32_07039	aor29_02411	are36_04381	are34_01093	are35_01280	as42_02055	as45_03985
bifunctional RNase H/acid phosphatase	aal1_02318	aaz3_03017	aaz4_03570	aco7_07141	ade8_00896	aja10_00869	ake13_06641	ake12_07446	ake14_02122	alu15_05060	alu16_00640	aor28_01198	aor32_07055	aor29_06285	are36_04365	are34_01077	are35_01264	as42_02071	as45_03969
hypothetical protein	aal1_02389	aaz3_02927	aaz4_03480	aco7_07075	ade8_00825	aja10_00789	ake13_06567	ake12_07373	ake14_02195	alu15_04989	alu16_00711	aor28_01118	aor32_07146	aor29_06389	are36_04293	are34_01005	are35_01192	as42_02175	as45_03892
hypothetical protein	aal1_02402	aaz3_02913	aaz4_03466	aco7_07061	ade8_00810	aja10_00776	ake13_06554	ake12_07360	ake14_02208	alu15_04975	alu16_00725	aor28_01104	aor32_07159	aor29_06403	are36_04279	are34_00991	are35_01178	as42_02188	as45_03879
putative uridylyltransferase	aal1_02423	aaz3_02891	aaz4_03444	aco7_07045	ade8_00789	aja10_00755	ake13_06477	ake12_07337	ake14_02231	alu15_04958	alu16_00742	aor28_01084	aor32_07179	aor29_06423	are36_04262	are34_00974	are35_01161	as42_02210	as45_03860
hypothetical protein	aal1_02515	aaz3_07106	aaz4_03329	aco7_06943	ade8_00729	aja10_00672	ake13_06405	ake12_07108	ake14_02878	alu15_04890	alu16_00810	aor28_00978	aor32_07232	aor29_06504	are36_04185	are34_00879	are35_01066	as42_02324	as45_03791
hypothetical protein	aal1_02582	aaz3_03133	aaz4_00452	aco7_06875	ade8_05512	aja10_00602	ake13_01957	ake12_07037	ake14_02949	alu15_04819	alu16_01956	aor28_00903	aor32_07301	aor29_06575	are36_04115	are34_00809	are35_00996	as42_02395	as45_08106
hypothetical protein	aal1_02655	aaz3_03219	aaz4_00366	aco7_06819	ade8_05578	aja10_00530	ake13_01888	ake12_06962	ake14_03024	alu15_04734	alu16_01871	aor28_00824	aor32_07373	aor29_06651	are36_04043	are34_00737	are35_00924	as42_02463	as45_02092
hypothetical protein	aal1_02656	aaz3_03220	aaz4_00365	aco7_06818	ade8_05579	aja10_00529	ake13_01887	ake12_06961	ake14_03025	alu15_04733	alu16_01870	aor28_00823	aor32_07374	aor29_06652	are36_04042	are34_00736	are35_00923	as42_02464	as45_02091
Molybdopterin synthase catalytic subunit 1	aal1_02688	aaz3_03253	aaz4_00332	aco7_06788	ade8_05609	aja10_00499	ake13_01857	ake12_06931	ake14_03055	alu15_04703	alu16_01840	aor28_00792	aor32_07405	aor29_06682	are36_04013	are34_00707	are35_00894	as42_02494	as45_02061
hypothetical protein	aal1_02762	aaz3_04806	aaz4_00256	aco7_06716	ade8_05677	aja10_00426	ake13_04698	ake12_06854	ake14_03132	alu15_04631	alu16_01768	aor28_00724	aor32_07479	aor29_06749	are36_03947	are34_00641	are35_00828	as42_02566	as45_01989
ECF RNA polymerase sigma factor SigD	aal1_02797	aaz3_06709	aaz4_00220	aco7_06682	ade8_05710	aja10_07733	ake13_04663	ake12_06819	ake14_03167	alu15_04596	alu16_01733	aor28_00688	aor32_07513	aor29_06780	are36_03917	are34_00611	are35_00798	as42_02603	as45_01955
ECF RNA polymerase sigma factor SigD	aal1_02805	aaz3_06717	aaz4_00212	aco7_06677	ade8_05718	aja10_07741	ake13_04655	ake12_06811	ake14_03175	alu15_04588	alu16_01725	aor28_00683	aor32_07521	aor29_06786	are36_03912	are34_00606	are35_00793	as42_02611	as45_01947
hypothetical protein	aal1_02831	aaz3_06740	aaz4_00189	aco7_04862	ade8_00652	aja10_07759	ake13_04635	ake12_06790	ake14_03196	alu15_04542	alu16_02628	aor28_00657	aor32_07538	aor29_06812	are36_00809	are34_00437	are35_04561	as42_02661	as45_01930
Peptidase family M1	aal1_02874	aaz3_06783	aaz4_00146	aco7_04896	ade8_00619	aja10_07804	ake13_00004	ake12_06746	ake14_03240	alu15_04500	alu16_02586	aor28_00622	aor32_07583	aor29_06855	are36_00842	are34_00404	are35_04528	as42_02706	as45_01886
HTH-type transcriptional regulator GltC	aal1_02875	aaz3_06784	aaz4_00145	aco7_04897	ade8_00618	aja10_07805	ake13_00005	ake12_06745	ake14_03241	alu15_04499	alu16_02585	aor28_00621	aor32_07584	aor29_06856	are36_00843	are34_00403	are35_04527	as42_02707	as45_01885
HTH-type transcriptional regulator GltC	aal1_02878	aaz3_06787	aaz4_00142	aco7_04900	ade8_00615	aja10_07808	ake13_00008	ake12_06742	ake14_03244	alu15_04496	alu16_02582	aor28_00618	aor32_07587	aor29_06859	are36_00846	are34_00400	are35_04524	as42_02710	as45_01882
hypothetical protein	aal1_02946	aaz3_04707	aaz4_00067	aco7_04977	ade8_00543	aja10_07886	ake13_05150	ake12_06643	ake14_07133	alu15_04423	alu16_02509	aor28_00548	aor32_07689	aor29_06932	are36_00918	are34_00328	are35_04452	as42_02788	as45_01807
hypothetical protein	aal1_03079	aaz3_07819	aaz4_02378	aco7_05120	ade8_07444	aja10_08017	ake13_04334	ake12_06508	ake14_06998	alu15_04275	alu16_04546	aor28_00421	aor32_07821	aor29_07608	are36_02081	are34_05524	are35_03349	as42_02919	as45_01678
Helicase IV	aal1_03112	aaz3_07850	aaz4_02347	aco7_05149	ade8_07469	aja10_08053	ake13_04304	ake12_06478	ake14_06968	alu15_04245	alu16_04516	aor28_00393	aor32_07848	aor29_07638	are36_02110	are34_05553	are35_03320	as42_02948	as45_01648
hypothetical protein	aal1_03170	aaz3_01458	aaz4_02625	aco7_05202	ade8_04734	aja10_08112	ake13_04245	ake12_06419	ake14_06909	alu15_04188	alu16_03698	aor28_00340	aor32_07908	aor29_07696	are36_02166	are34_05421	are35_03264	as42_03007	as45_01590
hypothetical protein	aal1_03272	aaz3_04903	aaz4_02512	aco7_05300	ade8_04645	aja10_08215	ake13_04141	ake12_06315	ake14_06805	alu15_04085	alu16_03595	aor28_00235	aor32_08011	aor29_02853	are36_02268	are34_05319	are35_03162	as42_03111	as45_01486
hypothetical protein	aal1_03316	aaz3_06634	aaz4_02730	aco7_05346	ade8_04615	aja10_08254	ake13_02990	ake12_06280	ake14_06770	alu15_04040	alu16_04349	aor28_00202	aor32_08045	aor29_02886	are36_02298	are34_05289	are35_03132	as42_03156	as45_01452
Inner membrane protein YbjJ	aal1_03463	aaz3_02181	aaz4_01376	aco7_01867	ade8_04485	aja10_08394	ake13_06037	ake12_06132	ake14_06622	alu15_03906	alu16_04483	aor28_00061	aor32_08188	aor29_03338	are36_02424	are34_05163	are35_03006	as42_03301	as45_01310
hypothetical protein	aal1_03587	aaz3_05278	aaz4_01250	aco7_01981	ade8_02552	aja10_00059	ake13_05909	ake12_06002	ake14_06492	alu15_03790	alu16_08186	aor28_08430	aor32_00060	aor29_03447	are36_00051	are34_03303	are35_01955	as42_03420	as45_01195
hypothetical protein	aal1_03688	aaz3_00016	aaz4_07648	aco7_02079	ade8_02652	aja10_00159	ake13_03946	ake12_05897	ake14_06387	alu15_03642	alu16_02363	aor28_08334	aor32_00157	aor29_05810	are36_05038	are34_03212	are35_05162	as42_03516	as45_01096
hypothetical protein	aal1_03739	aaz3_00066	aaz4_07598	aco7_02131	ade8_02697	aja10_00211	ake13_03042	ake12_05843	ake14_06333	alu15_03593	alu16_02412	aor28_08285	aor32_00206	aor29_05759	are36_05087	are34_03162	are35_05211	as42_03569	as45_01045
hypothetical protein	aal1_03770	aaz3_00097	aaz4_07567	aco7_02161	ade8_02727	aja10_00241	ake13_03074	ake12_05811	ake14_06301	alu15_03564	alu16_02441	aor28_08253	aor32_00237	aor29_05727	are36_05117	are34_03132	are35_05241	as42_03599	as45_01012
hypothetical protein	aal1_03829	aaz3_00135	aaz4_07529	aco7_02203	ade8_02780	aja10_00283	ake13_03117	ake12_05768	ake14_06258	alu15_03530	alu16_02475	aor28_08217	aor32_00281	aor29_05691	are36_05152	are34_03097	are35_05276	as42_03642	as45_00971
hypothetical protein	aal1_03870	aaz3_00173	aaz4_07491	aco7_02236	ade8_02824	aja10_00322	ake13_03158	ake12_05727	ake14_06217	alu15_03484	alu16_06583	aor28_08174	aor32_00322	aor29_05647	are36_05189	are34_03060	are35_05313	as42_03680	as45_00931
hypothetical protein	aal1_03890	aaz3_00194	aaz4_07470	aco7_02254	ade8_02842	aja10_00342	ake13_03179	ake12_05706	ake14_06196	alu15_03463	alu16_06604	aor28_08152	aor32_00343	aor29_05625	are36_05210	are34_03039	are35_05334	as42_03700	as45_00911
hypothetical protein	aal1_03897	aaz3_00207	aaz4_07457	aco7_02261	ade8_02849	aja10_00349	ake13_03186	ake12_05699	ake14_06189	alu15_03456	alu16_06611	aor28_08146	aor32_00349	aor29_05618	are36_05216	are34_03033	are35_05340	as42_03707	as45_00905
putative phospholipid ABC transporter-binding protein MlaD	aal1_03933	aaz3_05836	aaz4_07413	aco7_02295	ade8_02883	aja10_07552	ake13_03235	ake12_05556	ake14_01776	alu15_03394	alu16_07906	aor28_08001	aor32_00388	aor29_07082	are36_05253	are34_02996	are35_05377	as42_03757	as45_00865
PPE family protein	aal1_03951	aaz3_05855	aaz4_07394	aco7_02312	ade8_02901	aja10_07534	ake13_03255	ake12_05536	ake14_01756	alu15_03371	alu16_02696	aor28_07979	aor32_00404	aor29_07104	are36_05272	are34_02977	are35_05396	as42_03775	as45_00847
hypothetical protein	aal1_03953	aaz3_05856	aaz4_07393	aco7_02315	ade8_02903	aja10_07530	ake13_03256	ake12_05534	ake14_01753	alu15_03369	alu16_02698	aor28_07977	aor32_00406	aor29_07105	are36_05274	are34_02975	are35_05398	as42_03777	as45_00845
hypothetical protein	aal1_03954	aaz3_05859	aaz4_07390	aco7_02316	ade8_02904	aja10_07529	ake13_03257	ake12_05533	ake14_01752	alu15_03368	alu16_02699	aor28_07976	aor32_00407	aor29_07106	are36_05275	are34_02974	are35_05399	as42_03778	as45_00844
hypothetical protein	aal1_03997	aaz3_05904	aaz4_07345	aco7_02353	ade8_02950	aja10_07489	ake13_03296	ake12_05493	ake14_01712	alu15_03328	alu16_02739	aor28_07935	aor32_00446	aor29_07149	are36_05330	are34_02919	are35_05451	as42_03867	as45_00792
hypothetical protein	aal1_04003	aaz3_05910	aaz4_07339	aco7_02359	ade8_02956	aja10_07483	ake13_03302	ake12_05487	ake14_01706	alu15_03322	alu16_02745	aor28_07929	aor32_00452	aor29_07155	are36_05336	are34_02913	are35_05457	as42_03873	as45_00786
hypothetical protein	aal1_04166	aaz3_01186	aaz4_01570	aco7_02521	ade8_03118	aja10_07321	ake13_03419	ake12_05278	ake14_01497	alu15_03124	alu16_00035	aor28_07746	aor32_00616	aor29_05253	are36_05495	are34_02754	are35_05616	as42_05444	as45_00626
hypothetical protein	aal1_04254	aaz3_07656	aaz4_01484	aco7_01009	ade8_03203	aja10_07233	ake13_03331	ake12_05191	ake14_01410	alu15_03038	alu16_00121	aor28_07662	aor32_00703	aor29_05490	are36_05582	are34_02667	are35_05703	as42_05531	as45_00539
hypothetical protein	aal1_04379	aaz3_05322	aaz4_08176	aco7_01128	ade8_03318	aja10_07111	ake13_03757	ake12_05070	ake14_01288	alu15_02918	alu16_00241	aor28_07544	aor32_00840	aor29_05605	are36_05698	are34_02551	are35_05819	as42_05653	as45_00416
YhhN-like protein	aal1_04515	aaz3_02800	aaz4_08306	aco7_01254	ade8_04101	aja10_06954	ake13_03904	ake12_04935	ake14_01153	alu15_02786	alu16_00373	aor28_07405	aor32_00976	aor29_05965	are36_05827	are34_02422	are35_05948	as42_05809	as45_00278
Glyoxalase-like domain protein	aal1_04519	aaz3_02796	aaz4_08310	aco7_01258	ade8_04097	aja10_06950	ake13_03900	ake12_04931	ake14_01149	alu15_02782	alu16_00377	aor28_07401	aor32_00980	aor29_05969	are36_05831	are34_02418	are35_05952	as42_05813	as45_00274
hypothetical protein	aal1_04587	aaz3_02744	aaz4_08362	aco7_01311	ade8_04041	aja10_06896	ake13_03841	ake12_04876	ake14_01094	alu15_02723	alu16_00436	aor28_07333	aor32_01037	aor29_06023	are36_05890	are34_06652	are35_06011	as42_05868	as45_00219
hypothetical protein	aal1_04618	aaz3_02711	aaz4_08395	aco7_01343	ade8_04010	aja10_06865	ake13_03809	ake12_04844	ake14_01062	alu15_02691	alu16_08113	aor28_07301	aor32_01069	aor29_06055	are36_05921	are34_06621	are35_06042	as42_05899	as45_00188
hypothetical protein	aal1_04643	aaz3_02685	aaz4_08421	aco7_01367	ade8_03987	aja10_06842	ake13_07708	ake12_04819	ake14_01037	alu15_02666	alu16_04040	aor28_07277	aor32_01092	aor29_06078	are36_05946	are34_06596	are35_06067	as42_05924	as45_00163
hypothetical protein	aal1_04667	aaz3_08069	aaz4_08446	aco7_01392	ade8_03962	aja10_06816	ake13_06268	ake12_04793	ake14_01011	alu15_02641	alu16_04015	aor28_07251	aor32_01117	aor29_06106	are36_05973	are34_06569	are35_06094	as42_05950	as45_00137
hypothetical protein	aal1_04734	aaz3_07448	aaz4_06529	aco7_01457	ade8_07632	aja10_06743	ake13_06342	ake12_04718	ake14_00936	alu15_02568	alu16_03942	aor28_07178	aor32_01192	aor29_06177	are36_06995	are34_06075	are35_06163	as42_06023	as45_00064
Phytochrome-like protein cph2	aal1_04892	aaz3_06173	aaz4_01114	aco7_07715	ade8_06542	aja10_06590	ake13_04495	ake12_04557	ake14_07899	alu15_02419	alu16_05873	aor28_07030	aor32_01345	aor29_03098	are36_06347	are34_07193	are35_01565	as42_06606	as45_07106
hypothetical protein	aal1_04916	aaz3_06150	aaz4_01137	aco7_07692	ade8_06520	aja10_06567	ake13_04472	ake12_04534	ake14_05234	alu15_02396	alu16_05896	aor28_07006	aor32_01368	aor29_03121	are36_06368	are34_07214	are35_01586	as42_06583	as45_07128
Manganese transport system membrane protein MntB	aal1_04936	aaz3_06131	aaz4_01156	aco7_07673	ade8_06503	aja10_06547	ake13_04453	ake12_04515	ake14_05253	alu15_02379	alu16_05913	aor28_06988	aor32_01387	aor29_03140	are36_06383	are34_07229	are35_01601	as42_06565	as45_07146
putative ABC transporter ATP-binding protein	aal1_04937	aaz3_06130	aaz4_01157	aco7_07672	ade8_06502	aja10_06546	ake13_04452	ake12_04514	ake14_05254	alu15_02378	alu16_05914	aor28_06987	aor32_01388	aor29_03141	are36_06384	are34_07230	are35_01602	as42_06564	as45_07147
putative periplasmic iron-binding protein precursor	aal1_04938	aaz3_06129	aaz4_01158	aco7_07671	ade8_06501	aja10_06545	ake13_04451	ake12_04513	ake14_05255	alu15_02377	alu16_05915	aor28_06986	aor32_01389	aor29_03142	are36_06385	are34_07231	are35_01603	as42_06563	as45_07148
WD domain, G-beta repeat	aal1_04948	aaz3_03787	aaz4_05076	aco7_07660	ade8_06491	aja10_06532	ake13_04441	ake12_04503	ake14_05265	alu15_02365	alu16_05927	aor28_06974	aor32_01400	aor29_03153	are36_06395	are34_07241	are35_01613	as42_06552	as45_07159
von Willebrand factor type A domain protein	aal1_04949	aaz3_03788	aaz4_05075	aco7_07659	ade8_06490	aja10_06531	ake13_04440	ake12_04502	ake14_05266	alu15_02364	alu16_05928	aor28_06973	aor32_01401	aor29_03154	are36_06396	are34_07242	are35_01614	as42_06551	as45_07160
hypothetical protein	aal1_04950	aaz3_03789	aaz4_05074	aco7_07658	ade8_06489	aja10_06530	ake13_04439	ake12_04501	ake14_05267	alu15_02363	alu16_05929	aor28_06972	aor32_01402	aor29_03155	are36_06397	are34_07243	are35_01615	as42_06550	as45_07161
hypothetical protein	aal1_04951	aaz3_03790	aaz4_05073	aco7_07657	ade8_06488	aja10_06529	ake13_04438	ake12_04500	ake14_05268	alu15_02362	alu16_05930	aor28_06971	aor32_01403	aor29_03156	are36_06398	are34_07244	are35_01616	as42_06549	as45_07162
hypothetical protein	aal1_04986	aaz3_03823	aaz4_05040	aco7_07624	ade8_06457	aja10_06494	ake13_04404	ake12_04464	ake14_03692	alu15_02314	alu16_04173	aor28_06903	aor32_01437	aor29_04165	are36_06432	are34_07278	are35_01650	as42_06515	as45_07196
Erythromycin esterase	aal1_05000	aaz3_03839	aaz4_05024	aco7_07613	ade8_06445	aja10_06480	ake13_06855	ake12_04451	ake14_03705	alu15_02302	alu16_04161	aor28_06889	aor32_01455	aor29_04180	are36_06449	are34_07295	are35_01667	as42_06501	as45_07209
hypothetical protein	aal1_05003	aaz3_03846	aaz4_05017	aco7_07606	ade8_06438	aja10_06471	ake13_06866	ake12_04440	ake14_03716	alu15_02291	alu16_04150	aor28_06878	aor32_01467	aor29_04188	are36_06457	are34_07303	are35_01675	as42_06492	as45_07218
cAMP receptor protein	aal1_05009	aaz3_03851	aaz4_05012	aco7_07601	ade8_06433	aja10_06466	ake13_06871	ake12_04435	ake14_03721	alu15_02286	alu16_04144	aor28_06873	aor32_01472	aor29_04193	are36_06462	are34_07308	are35_01680	as42_06487	as45_07223
hypothetical protein	aal1_05010	aaz3_03852	aaz4_05011	aco7_07600	ade8_06431	aja10_06465	ake13_06872	ake12_04434	ake14_03722	alu15_02285	alu16_04143	aor28_06872	aor32_01473	aor29_04194	are36_06463	are34_07309	are35_01681	as42_06486	as45_07224
hypothetical protein	aal1_05221	aaz3_01692	aaz4_04846	aco7_02819	ade8_06325	aja10_06295	ake13_01684	ake12_04201	ake14_08676	alu15_02134	alu16_06666	aor28_06723	aor32_01633	aor29_00115	are36_06547	are34_07392	are35_06841	as42_06307	as45_07365
Glutamine transport ATP-binding protein GlnQ	aal1_05391	aaz3_05490	aaz4_05133	aco7_02658	ade8_06178	aja10_06116	ake13_01507	ake12_04023	ake14_06011	alu15_01966	alu16_03787	aor28_06559	aor32_01809	aor29_04828	are36_06692	are34_07537	are35_06695	as42_06129	as45_07542
FtsX-like permease family protein	aal1_05393	aaz3_05488	aaz4_05131	aco7_02656	ade8_06176	aja10_06114	ake13_01505	ake12_04021	ake14_06013	alu15_01964	alu16_03785	aor28_06557	aor32_01811	aor29_04830	are36_06694	are34_07539	are35_06693	as42_06127	as45_07544
hypothetical protein	aal1_05408	aaz3_05473	aaz4_05116	aco7_02639	ade8_06154	aja10_06098	ake13_01493	ake12_04010	ake14_06024	alu15_01951	alu16_03772	aor28_06543	aor32_01826	aor29_04843	are36_06704	are34_07549	are35_06683	as42_06112	as45_07558
hypothetical protein	aal1_05498	aaz3_01866	aaz4_08020	aco7_04696	ade8_07790	aja10_02928	ake13_06190	ake12_00812	ake14_02681	alu15_07343	alu16_07957	aor28_04960	aor32_05045	aor29_00033	are36_06883	are34_06821	are35_07178	as42_01877	as45_08280
hypothetical protein	aal1_05518	aaz3_01887	aaz4_08041	aco7_04678	ade8_07770	aja10_02949	ake13_06775	ake12_00834	ake14_02659	alu15_07365	alu16_05587	aor28_04939	aor32_05024	aor29_00015	are36_06866	are34_06838	are35_07161	as42_01857	as45_03775
hypothetical protein	aal1_05532	aaz3_01903	aaz4_08057	aco7_06447	ade8_07752	aja10_02962	ake13_05517	ake12_00844	ake14_02649	alu15_07378	alu16_05574	aor28_04931	aor32_05012	aor29_00008	are36_06857	are34_06847	are35_07152	as42_01844	as45_03763
hypothetical protein	aal1_05585	aaz3_08163	aaz4_08105	aco7_06417	ade8_05479	aja10_03005	ake13_05484	ake12_00879	ake14_02614	alu15_08411	alu16_05532	aor28_04903	aor32_04970	aor29_05321	are36_01239	are34_06872	are35_07127	as42_01802	as45_03723
UvrABC system protein A	aal1_05695	aaz3_04871	aaz4_07259	aco7_06497	ade8_05378	aja10_03115	ake13_05375	ake12_00986	ake14_02507	alu15_08045	alu16_04744	aor28_04808	aor32_04864	aor29_03865	are36_01143	are34_06970	are35_07029	as42_01691	as45_03616
Calcineurin-like phosphoesterase	aal1_05987	aaz3_00239	aaz4_01832	aco7_04439	ade8_01486	aja10_04147	ake13_04010	ake12_02113	ake14_04103	alu15_00058	alu16_00993	aor28_03824	aor32_03737	aor29_01415	are36_06019	are34_05965	are35_04313	as42_00581	as45_02550
bifunctional nicotinamide mononucleotide adenylyltransferase/ADP-ribose pyrophosphatase	aal1_06029	aaz3_00280	aaz4_01791	aco7_08269	ade8_04820	aja10_04103	ake13_04052	ake12_02073	ake14_04063	alu15_00017	alu16_01034	aor28_03866	aor32_03778	aor29_01376	are36_03372	are34_04831	are35_00512	as42_00623	as45_02591
Adenylosuccinate synthetase	aal1_06030	aaz3_00281	aaz4_01790	aco7_08268	ade8_04819	aja10_04102	ake13_04053	ake12_02072	ake14_04062	alu15_00016	alu16_01035	aor28_03867	aor32_03779	aor29_01375	are36_03373	are34_04832	are35_00511	as42_00624	as45_02592
hypothetical protein	aal1_06031	aaz3_00282	aaz4_01789	aco7_08267	ade8_04818	aja10_04101	ake13_04054	ake12_02071	ake14_04061	alu15_00015	alu16_01036	aor28_03868	aor32_03780	aor29_01374	are36_03374	are34_04833	are35_00510	as42_00625	as45_02593
hypothetical protein	aal1_06032	aaz3_00283	aaz4_01788	aco7_08266	ade8_04817	aja10_04100	ake13_04055	ake12_02070	ake14_04060	alu15_00014	alu16_01037	aor28_03869	aor32_03781	aor29_01373	are36_03375	are34_04834	are35_00509	as42_00626	as45_02594
hypothetical protein	aal1_06159	aaz3_00687	aaz4_04764	aco7_04002	ade8_07727	aja10_03980	ake13_02404	ake12_01949	ake14_00037	alu15_07895	alu16_01151	aor28_03993	aor32_03905	aor29_07281	are36_03488	are34_04947	are35_00396	as42_00745	as45_02712
putative ABC transporter ATP-binding protein YheS	aal1_06178	aaz3_00709	aaz4_04742	aco7_04020	ade8_07745	aja10_03959	ake13_02383	ake12_01928	ake14_00058	alu15_07876	alu16_01170	aor28_04018	aor32_03927	aor29_04762	are36_03508	are34_04967	are35_00376	as42_00766	as45_02734
HTH-type transcriptional regulator CdhR	aal1_06537	aaz3_04611	aaz4_04451	aco7_04424	ade8_04889	aja10_03749	ake13_02219	ake12_01765	ake14_00221	alu15_07815	alu16_05747	aor28_05369	aor32_04092	aor29_03571	are36_01989	are34_05851	are35_01849	as42_00970	as45_02954
Streptogrisin-D precursor	aal1_06582	aaz3_04560	aaz4_04400	aco7_05757	ade8_04915	aja10_03717	ake13_02197	ake12_01743	ake14_00243	alu15_07611	alu16_06096	aor28_06814	aor32_04114	aor29_04252	are36_06516	are34_07362	are35_06872	as42_00994	as45_02985
hypothetical protein	aal1_06634	aaz3_06479	aaz4_04344	aco7_06549	ade8_01700	aja10_03671	ake13_02147	ake12_01691	ake14_00295	alu15_07562	alu16_06145	aor28_04247	aor32_04159	aor29_04547	are36_01545	are34_03799	are35_02107	as42_01040	as45_03030
hypothetical protein	aal1_06635	aaz3_06480	aaz4_04343	aco7_06548	ade8_01699	aja10_03670	ake13_02146	ake12_01690	ake14_00296	alu15_07561	alu16_06146	aor28_04248	aor32_04160	aor29_04546	are36_01546	are34_03800	are35_02108	as42_01041	as45_03031
hypothetical protein	aal1_06758	aaz3_05144	aaz4_05348	aco7_04571	ade8_01616	aja10_03594	ake13_02075	ake12_01617	ake14_00369	alu15_07490	alu16_06217	aor28_04347	aor32_04242	aor29_04443	are36_01671	are34_03925	are35_02233	as42_01116	as45_03118
hypothetical protein	aal1_06898	aaz3_04207	aaz4_05536	aco7_08018	ade8_07558	aja10_03407	ake13_07840	ake12_01437	ake14_05738	alu15_08316	alu16_01530	aor28_04526	aor32_04421	aor29_01265	are36_01819	are34_04073	are35_02380	as42_01302	as45_03292
Acetyltransferase (GNAT) family protein	aal1_06927	aaz3_04241	aaz4_05570	aco7_08041	ade8_07174	aja10_03369	ake13_07873	ake12_01401	ake14_05774	alu15_08294	alu16_01552	aor28_04546	aor32_04442	aor29_01286	are36_01840	are34_04094	are35_02401	as42_01339	as45_03314
hypothetical protein	aal1_07334	aaz3_01977	aaz4_06740	aco7_03105	ade8_01145	aja10_04190	ake13_05789	ake12_02159	ake14_04149	alu15_00105	alu16_00946	aor28_03763	aor32_03687	aor29_01480	are36_04897	are34_01234	are35_00173	as42_00536	as45_02494
Magnesium and cobalt efflux protein CorC	aal1_07363	aaz3_03460	aaz4_07281	aco7_03081	ade8_01177	aja10_04220	ake13_05757	ake12_02191	ake14_04181	alu15_00134	alu16_00917	aor28_03740	aor32_03656	aor29_01505	are36_04872	are34_01259	are35_00148	as42_00506	as45_02463
hypothetical protein	aal1_07365	aaz3_03455	aaz4_07276	aco7_03076	ade8_01179	aja10_04222	ake13_05752	ake12_02196	ake14_04186	alu15_00139	alu16_00912	aor28_03738	aor32_03652	aor29_01507	are36_04870	are34_01261	are35_00146	as42_00504	as45_02459
ECF RNA polymerase sigma factor SigD	aal1_07445	aaz3_07982	aaz4_00597	aco7_03008	ade8_01267	aja10_04325	ake13_08242	ake12_02295	ake14_04285	alu15_00229	alu16_05390	aor28_03662	aor32_03553	aor29_01591	are36_04793	are34_01338	are35_00069	as42_00402	as45_02360
Dioxygenase	aal1_07510	aaz3_01615	aaz4_03059	aco7_07511	ade8_01109	aja10_04578	ake13_05177	ake12_02522	ake14_04976	alu15_00274	alu16_05435	aor28_04683	aor32_03310	aor29_01828	are36_03174	are34_00155	are35_00658	as42_00138	as45_08345
Tripeptidyl aminopeptidase precursor	aal1_07556	aaz3_05639	aaz4_03234	aco7_02925	ade8_06829	aja10_04434	ake13_08338	ake12_02393	ake14_04383	alu15_00310	alu16_05471	aor28_03568	aor32_03457	aor29_05448	are36_00771	are34_01417	are35_07250	as42_00292	as45_02256
hypothetical protein	aal1_07572	aaz3_05622	aaz4_03217	aco7_02908	ade8_06842	aja10_04453	ake13_08356	ake12_02411	ake14_04401	alu15_00331	alu16_01228	aor28_03556	aor32_03437	aor29_05436	are36_00759	are34_01429	are35_07262	as42_00273	as45_02237
Universal stress protein/MT2061	aal1_07894	aaz3_06041	aaz4_02924	aco7_04401	ade8_02433	aja10_04654	ake13_05278	ake12_02624	ake14_04874	alu15_00621	alu16_07680	aor28_03300	aor32_03260	aor29_02229	are36_00576	are34_01612	are35_07445	as42_00067	as45_06262
hypothetical protein	aal1_07903	aaz3_06050	aaz4_02915	aco7_04412	ade8_02384	aja10_04704	ake13_07554	ake12_02673	ake14_08615	alu15_00669	alu16_06531	aor28_03252	aor32_03212	aor29_02279	are36_00529	are34_01659	are35_07492	as42_00019	as45_06213
hypothetical protein	aal1_07960	aaz3_06101	aaz4_02864	aco7_03143	ade8_02329	aja10_04763	ake13_01766	ake12_02735	ake14_08553	alu15_00728	alu16_06472	aor28_03195	aor32_03153	aor29_02339	are36_00470	are34_01718	are35_07551	as42_05278	as45_06151
putative diguanylate cyclase YcdT	aal1_07965	aaz3_06106	aaz4_02859	aco7_03148	ade8_02324	aja10_04768	ake13_01761	ake12_02740	ake14_08548	alu15_00733	alu16_06467	aor28_03190	aor32_03148	aor29_02344	are36_00465	are34_01723	are35_07556	as42_05273	as45_06146
hypothetical protein	aal1_07976	aaz3_06118	aaz4_02847	aco7_03158	ade8_02312	aja10_04781	ake13_01747	ake12_02753	ake14_08535	alu15_00744	alu16_06456	aor28_03177	aor32_03135	aor29_02357	are36_00455	are34_01733	are35_07566	as42_05260	as45_06133
EamA-like transporter family protein	aal1_07991	aaz3_01514	aaz4_02829	aco7_03172	ade8_02302	aja10_04798	ake13_07500	ake12_02769	ake14_03659	alu15_00757	alu16_06443	aor28_03167	aor32_05345	aor29_02367	are36_00446	are34_01742	are35_07577	as42_05243	as45_06117
hypothetical protein	aal1_07997	aaz3_01520	aaz4_02823	aco7_03177	ade8_04947	aja10_04803	ake13_07494	ake12_02774	ake14_03654	alu15_00761	alu16_07643	aor28_03160	aor32_05351	aor29_02374	are36_00439	are34_01749	are35_07584	as42_05238	as45_06111
hypothetical protein	aal1_08009	aaz3_01532	aaz4_02811	aco7_03189	ade8_04961	aja10_04818	ake13_07478	ake12_02791	ake14_03637	alu15_00776	alu16_07628	aor28_03147	aor32_05366	aor29_02387	are36_00427	are34_01761	are35_07596	as42_05223	as45_06096
hypothetical protein	aal1_08100	aaz3_01230	aaz4_02308	aco7_03233	ade8_01850	aja10_04883	ake13_04722	ake12_02856	ake14_07929	alu15_00824	alu16_03389	aor28_03103	aor32_02920	aor29_07942	are36_00382	are34_01805	are35_07640	as42_05172	as45_06046
putative transcriptional regulator	aal1_08150	aaz3_01277	aaz4_02261	aco7_01854	ade8_01807	aja10_04928	ake13_04770	ake12_02906	ake14_05652	alu15_00872	alu16_03341	aor28_03057	aor32_02872	aor29_07896	are36_00337	are34_01850	are35_07685	as42_05127	as45_06001
Major Facilitator Superfamily protein	aal1_08151	aaz3_01278	aaz4_02260	aco7_01853	ade8_01806	aja10_04929	ake13_04771	ake12_02907	ake14_05653	alu15_00873	alu16_03340	aor28_03056	aor32_02871	aor29_07895	are36_00336	are34_01851	are35_07686	as42_05126	as45_06000
FHA domain-containing protein FhaA	aal1_08203	aaz3_01326	aaz4_02213	aco7_01799	ade8_01756	aja10_04984	ake13_04821	ake12_02957	ake14_07855	alu15_00926	alu16_03286	aor28_03003	aor32_02823	aor29_07846	are36_00287	are34_01900	are35_06440	as42_05071	as45_05945
hypothetical protein	aal1_08246	aaz3_01369	aaz4_02170	aco7_01749	ade8_03372	aja10_05029	ake13_04867	ake12_03004	ake14_05324	alu15_00971	alu16_03241	aor28_02961	aor32_02781	aor29_02092	are36_00244	are34_01943	are35_06397	as42_05026	as45_05899
SnoaL-like domain protein	aal1_08488	aaz3_05427	aaz4_01931	aco7_01518	ade8_05895	aja10_05265	ake13_01125	ake12_03246	ake14_04737	alu15_01209	alu16_05710	aor28_02731	aor32_02543	aor29_00669	are36_02785	are34_04286	are35_03481	as42_04789	as45_05664
Branched-chain amino acid transport protein (AzlD)	aal1_08680	aaz3_03371	aaz4_07851	aco7_00176	ade8_01389	aja10_05447	ake13_00931	ake12_03441	ake14_04542	alu15_01401	alu16_03445	aor28_02546	aor32_02363	aor29_00858	are36_02961	are34_04462	are35_03657	as42_04608	as45_05483
Inner membrane protein YgaZ	aal1_08681	aaz3_03370	aaz4_07852	aco7_00177	ade8_01390	aja10_05448	ake13_00930	ake12_03442	ake14_04541	alu15_01402	alu16_03446	aor28_02545	aor32_02362	aor29_00859	are36_02962	are34_04463	are35_03658	as42_04607	as45_05482

## Sheet: S4B
Supplementary Table 4B. Genes specific to Group B
Function	1	2	3	4	5	6	7	8	9	10	11	12	13	14	15	16
hypothetical protein	aau2_00273	aba5_05416	aken57_06784	ale56_00541	ame18_03040	ame19_08238	ame20_00898	ame21_00802	ame22_00795	ame23_00801	ame24_00794	apr33_02901	ari37_06348	ato48_01700	ava50_02255	ava49_02698
hypothetical protein	aau2_00666	aba5_05002	aken57_00464	ale56_01197	ame18_04180	ame19_04962	ame20_04740	ame21_00334	ame22_00333	ame23_00333	ame24_00333	apr33_02510	ari37_07816	ato48_00768	ava50_03431	ava49_08061
hypothetical protein	aau2_00878	aba5_04807	aken57_01390	ale56_01779	ame18_04004	ame19_04786	ame20_02398	ame21_00157	ame22_00157	ame23_00157	ame24_00157	apr33_02297	ari37_07996	ato48_00497	ava50_02456	ava49_01278
hypothetical protein	aau2_00918	aba5_04773	aken57_03235	ale56_02624	ame18_03965	ame19_04747	ame20_05889	ame21_00118	ame22_00118	ame23_00118	ame24_00118	apr33_02254	ari37_08032	ato48_00461	ava50_08141	ava49_01316
hypothetical protein	aau2_00969	aba5_04719	aken57_08810	ale56_00497	ame18_03910	ame19_04533	ame20_03124	ame21_00066	ame22_00066	ame23_00066	ame24_00066	apr33_02200	ari37_06608	ato48_00410	ava50_02650	ava49_01369
Penicillin-binding protein 1A	aau2_01090	aba5_04546	aken57_00675	ale56_00838	ame18_00557	ame19_02825	ame20_00337	ame21_09502	ame22_09481	ame23_09486	ame24_09482	apr33_03128	ari37_06741	ato48_00269	ava50_05046	ava49_01497
hypothetical protein	aau2_01097	aba5_04539	aken57_00666	ale56_00845	ame18_00563	ame19_02831	ame20_00343	ame21_09496	ame22_09475	ame23_09480	ame24_09476	apr33_03135	ari37_06747	ato48_00263	ava50_01008	ava49_01507
Glucose--fructose oxidoreductase precursor	aau2_01183	aba5_04447	aken57_04704	ale56_08079	ame18_00654	ame19_02922	ame20_00434	ame21_09405	ame22_09384	ame23_09389	ame24_09385	apr33_03227	ari37_06834	ato48_00169	ava50_00657	ava49_01594
hypothetical protein	aau2_01211	aba5_04423	aken57_02294	ale56_05614	ame18_00681	ame19_02949	ame20_00461	ame21_09378	ame22_09357	ame23_09362	ame24_09358	apr33_03256	ari37_05028	ato48_00141	ava50_00684	ava49_01622
hypothetical protein	aau2_01227	aba5_04408	aken57_02504	ale56_00810	ame18_00695	ame19_02963	ame20_00475	ame21_09364	ame22_09343	ame23_09348	ame24_09344	apr33_03272	ari37_06871	ato48_00127	ava50_06764	ava49_07028
Cellulase (glycosyl hydrolase family 5)	aau2_01238	aba5_04401	aken57_02515	ale56_06155	ame18_00705	ame19_02973	ame20_00485	ame21_09354	ame22_09333	ame23_09338	ame24_09334	apr33_03285	ari37_06883	ato48_00115	ava50_07936	ava49_07011
putative hydrolase	aau2_01382	aba5_04263	aken57_08635	ale56_08515	ame18_00852	ame19_03120	ame20_07264	ame21_09207	ame22_09186	ame23_09191	ame24_09187	apr33_03447	ari37_00412	ato48_09164	ava50_00898	ava49_03649
Glyoxalase-like domain protein	aau2_01393	aba5_04246	aken57_04495	ale56_03658	ame18_00866	ame19_03134	ame20_07278	ame21_09193	ame22_09172	ame23_09177	ame24_09173	apr33_03462	ari37_00425	ato48_09151	ava50_03530	ava49_03632
Non-hemolytic phospholipase C precursor	aau2_01409	aba5_04225	aken57_04477	ale56_03679	ame18_00884	ame19_03152	ame20_07296	ame21_09175	ame22_09154	ame23_09159	ame24_09155	apr33_03484	ari37_00443	ato48_09136	ava50_06993	ava49_03616
RHS Repeat protein	aau2_01697	aba5_03876	aken57_00030	ale56_03208	ame18_04721	ame19_01216	ame20_05702	ame21_08857	ame22_08837	ame23_08843	ame24_08839	apr33_03804	ari37_04115	ato48_08826	ava50_00959	ava49_03313
Serine/threonine-protein kinase PknD	aau2_01718	aba5_03848	aken57_08009	ale56_07842	ame18_04751	ame19_01186	ame20_05672	ame21_08827	ame22_08807	ame23_08813	ame24_08809	apr33_03833	ari37_04137	ato48_08796	ava50_05864	ava49_03284
hypothetical protein	aau2_01797	aba5_03772	aken57_03406	ale56_02109	ame18_04826	ame19_01111	ame20_05597	ame21_08752	ame22_08732	ame23_08738	ame24_08734	apr33_08962	ari37_00647	ato48_08719	ava50_03606	ava49_03202
hypothetical protein	aau2_01813	aba5_03758	aken57_05313	ale56_07504	ame18_04837	ame19_01100	ame20_06949	ame21_08741	ame22_08721	ame23_08727	ame24_08723	apr33_08978	ari37_00662	ato48_08706	ava50_03593	ava49_03189
hypothetical protein	aau2_01868	aba5_03703	aken57_04417	ale56_05139	ame18_04900	ame19_01037	ame20_06886	ame21_08678	ame22_08658	ame23_08664	ame24_08660	apr33_09044	ari37_00723	ato48_08644	ava50_03827	ava49_03132
Cell wall synthesis protein Wag31	aau2_02133	aba5_03423	aken57_05106	ale56_01561	ame18_05142	ame19_00796	ame20_06644	ame21_08435	ame22_08416	ame23_08422	ame24_08418	apr33_05892	ari37_08477	ato48_08376	ava50_01158	ava49_07430
hypothetical protein	aau2_02169	aba5_03381	aken57_04546	ale56_03454	ame18_05182	ame19_00756	ame20_06604	ame21_08395	ame22_08376	ame23_08382	ame24_08378	apr33_05846	ari37_06967	ato48_08342	ava50_07708	ava49_07469
Polyketide cyclase / dehydrase and lipid transport	aau2_02377	aba5_03155	aken57_03149	ale56_09131	ame18_05424	ame19_00513	ame20_08152	ame21_08152	ame22_08133	ame23_08139	ame24_08134	apr33_05525	ari37_01292	ato48_08016	ava50_00870	ava49_02294
hypothetical protein	aau2_02686	aba5_02896	aken57_08298	ale56_08929	ame18_03632	ame19_06688	ame20_06986	ame21_07840	ame22_07822	ame23_07828	ame24_07823	apr33_05216	ari37_00956	ato48_07739	ava50_00155	ava49_02023
hypothetical protein	aau2_02691	aba5_02888	aken57_08292	ale56_08935	ame18_03537	ame19_03644	ame20_01218	ame21_07834	ame22_07816	ame23_07822	ame24_07817	apr33_05203	ari37_00952	ato48_07735	ava50_00160	ava49_02019
Inactive dihydropteroate synthase 2	aau2_02711	aba5_02868	aken57_09182	ale56_06258	ame18_03518	ame19_03663	ame20_01237	ame21_07815	ame22_07797	ame23_07803	ame24_07798	apr33_05180	ari37_00931	ato48_07712	ava50_04781	ava49_01996
hypothetical protein	aau2_02714	aba5_02864	aken57_08336	ale56_06243	ame18_03513	ame19_03668	ame20_01242	ame21_07810	ame22_07792	ame23_07798	ame24_07793	apr33_05171	ari37_00928	ato48_07707	ava50_04778	ava49_01993
hypothetical protein	aau2_02718	aba5_02861	aken57_05922	ale56_09824	ame18_03509	ame19_03672	ame20_01246	ame21_07806	ame22_07788	ame23_07794	ame24_07789	apr33_05167	ari37_03914	ato48_07704	ava50_04775	ava49_01990
hypothetical protein	aau2_02749	aba5_02858	aken57_02836	ale56_07581	ame18_03485	ame19_03696	ame20_01270	ame21_07782	ame22_07764	ame23_07770	ame24_07765	apr33_05135	ari37_03881	ato48_07675	ava50_05107	ava49_01957
Chitinase C precursor	aau2_02826	aba5_02784	aken57_02363	ale56_03001	ame18_09206	ame19_03552	ame20_07352	ame21_07700	ame22_07682	ame23_07688	ame24_07683	apr33_05031	ari37_03801	ato48_07597	ava50_08320	ava49_07868
ANTAR domain protein	aau2_02866	aba5_02751	aken57_08038	ale56_01356	ame18_09166	ame19_04313	ame20_03181	ame21_07660	ame22_07642	ame23_07648	ame24_07643	apr33_01216	ari37_00818	ato48_07555	ava50_03016	ava49_04561
Ferritin BfrB	aau2_02888	aba5_02740	aken57_03060	ale56_07059	ame18_09149	ame19_04330	ame20_03198	ame21_07643	ame22_07625	ame23_07631	ame24_07626	apr33_01166	ari37_00833	ato48_07533	ava50_08585	ava49_04602
hypothetical protein	aau2_02892	aba5_02724	aken57_03046	ale56_07050	ame18_09137	ame19_04342	ame20_03210	ame21_07631	ame22_07613	ame23_07619	ame24_07614	apr33_01153	ari37_05177	ato48_07513	ava50_08577	ava49_04610
hypothetical protein	aau2_03065	aba5_02414	aken57_02885	ale56_06361	ame18_08948	ame19_00325	ame20_07507	ame21_07188	ame22_07170	ame23_07176	ame24_07171	apr33_04426	ari37_05321	ato48_07332	ava50_02814	ava49_04775
hypothetical protein	aau2_03101	aba5_02368	aken57_05464	ale56_03292	ame18_08905	ame19_00368	ame20_07464	ame21_07145	ame22_07127	ame23_07133	ame24_07128	apr33_04369	ari37_05359	ato48_07270	ava50_08446	ava49_04833
hypothetical protein	aau2_03161	aba5_02284	aken57_01569	ale56_00384	ame18_08831	ame19_00442	ame20_07390	ame21_07071	ame22_07053	ame23_07059	ame24_07054	apr33_04307	ari37_08121	ato48_07204	ava50_01633	ava49_04900
Copper-exporting P-type ATPase A	aau2_03173	aba5_07647	aken57_08742	ale56_09079	ame18_01719	ame19_08533	ame20_02563	ame21_07058	ame22_07040	ame23_07046	ame24_07041	apr33_01115	ari37_05596	ato48_07191	ava50_03903	ava49_08272
hypothetical protein	aau2_03188	aba5_07660	aken57_00163	ale56_04768	ame18_01706	ame19_08546	ame20_02576	ame21_07045	ame22_07027	ame23_07033	ame24_07028	apr33_01101	ari37_05609	ato48_07176	ava50_05072	ava49_08286
hypothetical protein	aau2_03191	aba5_07663	aken57_00166	ale56_05464	ame18_01703	ame19_08549	ame20_02579	ame21_07042	ame22_07024	ame23_07030	ame24_07025	apr33_01098	ari37_05612	ato48_07173	ava50_02999	ava49_08289
hypothetical protein	aau2_03193	aba5_07665	aken57_00290	ale56_05467	ame18_01701	ame19_08551	ame20_02581	ame21_07040	ame22_07022	ame23_07028	ame24_07023	apr33_01096	ari37_05614	ato48_07171	ava50_03001	ava49_08291
transcriptional regulator BetI	aau2_03391	aba5_07770	aken57_00600	ale56_08561	ame18_02103	ame19_07805	ame20_00046	ame21_06924	ame22_06908	ame23_06913	ame24_06909	apr33_00970	ari37_01444	ato48_07042	ava50_07628	ava49_01728
Daunorubicin/doxorubicin resistance ATP-binding protein DrrA	aau2_03392	aba5_07771	aken57_00601	ale56_08560	ame18_02102	ame19_07804	ame20_00047	ame21_06923	ame22_06907	ame23_06912	ame24_06908	apr33_00969	ari37_01445	ato48_07041	ava50_07627	ava49_01729
hypothetical protein	aau2_03393	aba5_07772	aken57_00602	ale56_07688	ame18_02101	ame19_07803	ame20_00048	ame21_06922	ame22_06906	ame23_06911	ame24_06907	apr33_00968	ari37_01446	ato48_07040	ava50_07451	ava49_01730
hypothetical protein	aau2_03405	aba5_07788	aken57_00618	ale56_07074	ame18_02088	ame19_07790	ame20_00061	ame21_06909	ame22_06893	ame23_06898	ame24_06894	apr33_00946	ari37_01463	ato48_07028	ava50_03064	ava49_01748
hypothetical protein	aau2_03430	aba5_07812	aken57_01640	ale56_06690	ame18_02059	ame19_07761	ame20_00090	ame21_06880	ame22_06864	ame23_06869	ame24_06865	apr33_00919	ari37_01489	ato48_06996	ava50_08495	ava49_01774
hypothetical protein	aau2_03793	aba5_08128	aken57_07810	ale56_04840	ame18_02338	ame19_07419	ame20_03394	ame21_06538	ame22_06522	ame23_06527	ame24_06523	apr33_00722	ari37_00590	ato48_06754	ava50_06418	ava49_05863
RNA polymerase sigma factor	aau2_03808	aba5_08161	aken57_07637	ale56_09090	ame18_02321	ame19_07402	ame20_03376	ame21_06520	ame22_06504	ame23_06509	ame24_06505	apr33_00707	ari37_00576	ato48_06738	ava50_00438	ava49_05877
CGNR zinc finger	aau2_03928	aba5_08288	aken57_03542	ale56_09076	ame18_02192	ame19_07273	ame20_00634	ame21_06391	ame22_06375	ame23_06380	ame24_06376	apr33_00589	ari37_05465	ato48_06614	ava50_06399	ava49_05992
Sortase family protein	aau2_03958	aba5_08322	aken57_05830	ale56_08395	ame18_05756	ame19_02431	ame20_05438	ame21_03040	ame22_03029	ame23_03035	ame24_03032	apr33_00462	ari37_07508	ato48_03367	ava50_00316	ava49_06024
hypothetical protein	aau2_04085	aba5_07447	aken57_07038	ale56_01091	ame18_05920	ame19_02266	ame20_05273	ame21_02875	ame22_02864	ame23_02870	ame24_02865	apr33_01998	ari37_07646	ato48_03223	ava50_02074	ava49_06681
F420-dependent glucose-6-phosphate dehydrogenase	aau2_04131	aba5_07493	aken57_06080	ale56_05762	ame18_05866	ame19_02320	ame20_05327	ame21_02929	ame22_02918	ame23_02924	ame24_02919	apr33_09492	ari37_07596	ato48_03269	ava50_02023	ava49_06631
hypothetical protein	aau2_04229	aba5_08855	aken57_05206	ale56_06542	ame18_05617	ame19_02570	ame20_05577	ame21_03179	ame22_03168	ame23_03174	ame24_03171	apr33_07469	ari37_01332	ato48_03535	ava50_01666	ava49_06551
Endoglucanase E-4 precursor	aau2_04317	aba5_00949	aken57_02314	ale56_01396	ame18_07259	ame19_06081	ame20_08704	ame21_04015	ame22_04002	ame23_04009	ame24_04007	apr33_09379	ari37_02286	ato48_05996	ava50_04918	ava49_01921
Ricin-type beta-trefoil lectin domain protein	aau2_04335	aba5_01040	aken57_07716	ale56_04982	ame18_07316	ame19_06138	ame20_08648	ame21_04071	ame22_04059	ame23_04065	ame24_04063	apr33_06153	ari37_07380	ato48_03979	ava50_02616	ava49_05582
hypothetical protein	aau2_04525	aba5_09238	aken57_05214	ale56_03081	ame18_04399	ame19_06961	ame20_01680	ame21_03520	ame22_03508	ame23_03515	ame24_03513	apr33_07828	ari37_07268	ato48_05776	ava50_07725	ava49_00011
ECF RNA polymerase sigma factor SigE	aau2_04526	aba5_09239	aken57_05213	ale56_03080	ame18_04400	ame19_06960	ame20_01681	ame21_03521	ame22_03509	ame23_03516	ame24_03514	apr33_07827	ari37_07267	ato48_05775	ava50_07724	ava49_00012
hypothetical protein	aau2_04697	aba5_00685	aken57_00985	ale56_08698	ame18_08138	ame19_03438	ame20_01192	ame21_05419	ame22_05405	ame23_05410	ame24_05408	apr33_07704	ari37_07460	ato48_04266	ava50_02544	ava49_01010
N-acyltransferase YncA	aau2_04750	aba5_00626	aken57_05072	ale56_06378	ame18_08195	ame19_03495	ame20_01135	ame21_05362	ame22_05348	ame23_05353	ame24_05351	apr33_07644	ari37_03643	ato48_04328	ava50_06438	ava49_00953
HTH-type transcriptional repressor CytR	aau2_04765	aba5_00613	aken57_05060	ale56_01944	ame18_08208	ame19_03508	ame20_01122	ame21_05349	ame22_05335	ame23_05340	ame24_05338	apr33_07629	ari37_03630	ato48_04340	ava50_04545	ava49_00938
L-arabonate dehydratase	aau2_04824	aba5_00567	aken57_04167	ale56_04113	ame18_08340	ame19_08715	ame20_00281	ame21_05299	ame22_05285	ame23_05290	ame24_05288	apr33_07575	ari37_03432	ato48_04385	ava50_01420	ava49_07823
putative sugar isomerase YihS	aau2_04837	aba5_00555	aken57_09229	ale56_05111	ame18_08352	ame19_08727	ame20_00269	ame21_05287	ame22_05273	ame23_05278	ame24_05276	apr33_07562	ari37_05955	ato48_04398	ava50_08057	ava49_07811
Exoglucanase/xylanase precursor	aau2_04839	aba5_00553	aken57_09227	ale56_05109	ame18_08354	ame19_08729	ame20_00267	ame21_05285	ame22_05271	ame23_05276	ame24_05274	apr33_07560	ari37_05953	ato48_04401	ava50_08054	ava49_07809
hypothetical protein	aau2_04850	aba5_00537	aken57_03761	ale56_03800	ame18_08374	ame19_08749	ame20_01910	ame21_05265	ame22_05251	ame23_05256	ame24_05254	apr33_07540	ari37_05940	ato48_04416	ava50_05426	ava49_07789
hypothetical protein	aau2_04861	aba5_00526	aken57_04526	ale56_02747	ame18_08385	ame19_08760	ame20_01921	ame21_05254	ame22_05240	ame23_05245	ame24_05243	apr33_07528	ari37_05930	ato48_04427	ava50_05575	ava49_07779
hypothetical protein	aau2_04867	aba5_00521	aken57_04532	ale56_02740	ame18_08391	ame19_08766	ame20_01927	ame21_05248	ame22_05234	ame23_05239	ame24_05237	apr33_02106	ari37_04958	ato48_04432	ava50_05581	ava49_07773
hypothetical protein	aau2_05128	aba5_00255	aken57_03099	ale56_03353	ame18_01524	ame19_03835	ame20_04466	ame21_04971	ame22_04957	ame23_04962	ame24_04960	apr33_07264	ari37_04948	ato48_04700	ava50_01451	ava49_00343
Modulator of FtsH protease HflK	aau2_05223	aba5_00116	aken57_02667	ale56_06790	ame18_06650	ame19_05080	ame20_01390	ame21_04759	ame22_04744	ame23_04750	ame24_04748	apr33_07148	ari37_05735	ato48_04911	ava50_08134	ava49_00553
SPFH domain / Band 7 family protein	aau2_05295	aba5_09745	aken57_02780	ale56_07262	ame18_06724	ame19_05154	ame20_01465	ame21_04683	ame22_04669	ame23_04675	ame24_04673	apr33_07063	ari37_07227	ato48_05011	ava50_07948	ava49_00640
inorganic polyphosphate/ATP-NAD kinase	aau2_05296	aba5_09744	aken57_02779	ale56_07263	ame18_06725	ame19_05155	ame20_01466	ame21_04682	ame22_04668	ame23_04674	ame24_04672	apr33_07062	ari37_07226	ato48_05012	ava50_07947	ava49_00641
Putative cytochrome P450 120	aau2_05436	aba5_09659	aken57_03424	ale56_02142	ame18_07827	ame19_06648	ame20_04111	ame21_04584	ame22_04570	ame23_04576	ame24_04574	apr33_06907	ari37_07123	ato48_05115	ava50_07619	ava49_00769
hypothetical protein	aau2_05441	aba5_09654	aken57_03429	ale56_02147	ame18_07822	ame19_06643	ame20_04116	ame21_04579	ame22_04565	ame23_04571	ame24_04569	apr33_06902	ari37_07118	ato48_05120	ava50_07614	ava49_00774
hypothetical protein	aau2_05448	aba5_09648	aken57_01824	ale56_09637	ame18_07808	ame19_06629	ame20_04130	ame21_04565	ame22_04551	ame23_04557	ame24_04555	apr33_06882	ari37_07107	ato48_05134	ava50_06255	ava49_00789
hypothetical protein	aau2_05469	aba5_09626	aken57_09275	ale56_03056	ame18_07776	ame19_06597	ame20_09248	ame21_04533	ame22_04519	ame23_04525	ame24_04523	apr33_06858	ari37_02144	ato48_05167	ava50_04646	ava49_00821
Intracellular endo-alpha-(1->5)-L-arabinanase	aau2_05473	aba5_01944	aken57_01884	ale56_03060	ame18_07771	ame19_06592	ame20_09243	ame21_04528	ame22_04514	ame23_04520	ame24_04518	apr33_06850	ari37_02135	ato48_05172	ava50_07817	ava49_00828
Pectinesterase A precursor	aau2_05474	aba5_09619	aken57_01883	ale56_03061	ame18_07770	ame19_06591	ame20_09242	ame21_04527	ame22_04513	ame23_04519	ame24_04517	apr33_06849	ari37_02134	ato48_05173	ava50_07818	ava49_00829
Lactose operon repressor	aau2_05498	aba5_09595	aken57_03534	ale56_08611	ame18_07741	ame19_06562	ame20_09213	ame21_04498	ame22_04484	ame23_04490	ame24_04488	apr33_06815	ari37_02101	ato48_05201	ava50_00525	ava49_00859
Extracellular exo-alpha-L-arabinofuranosidase precursor	aau2_05508	aba5_09584	aken57_07369	ale56_08620	ame18_07733	ame19_06554	ame20_09205	ame21_04490	ame22_04476	ame23_04482	ame24_04480	apr33_06806	ari37_02093	ato48_05210	ava50_00517	ava49_00867
Oxygen regulatory protein NreC	aau2_05644	aba5_09190	aken57_00364	ale56_07729	ame18_07572	ame19_06393	ame20_09044	ame21_04328	ame22_04315	ame23_04321	ame24_04319	apr33_06630	ari37_01951	ato48_05407	ava50_03923	ava49_05289
hypothetical protein	aau2_05645	aba5_09189	aken57_00363	ale56_07728	ame18_07571	ame19_06392	ame20_09043	ame21_04327	ame22_04314	ame23_04320	ame24_04318	apr33_06629	ari37_01950	ato48_05408	ava50_03924	ava49_05288
Carbohydrate acetyl esterase/feruloyl esterase precursor	aau2_05687	aba5_09156	aken57_01684	ale56_05562	ame18_07535	ame19_06357	ame20_09007	ame21_04291	ame22_04278	ame23_04284	ame24_04282	apr33_06573	ari37_08629	ato48_05441	ava50_07673	ava49_05236
ANTAR domain protein	aau2_05698	aba5_09147	aken57_01674	ale56_09901	ame18_07523	ame19_06345	ame20_08995	ame21_04279	ame22_04266	ame23_04272	ame24_04270	apr33_06558	ari37_06544	ato48_05450	ava50_04561	ava49_05224
Anti-sigma-F factor antagonist RsfB	aau2_05732	aba5_08921	aken57_02598	ale56_09025	ame18_05525	ame19_02662	ame20_04725	ame21_03271	ame22_03260	ame23_03266	ame24_03264	apr33_06522	ari37_05400	ato48_03702	ava50_04535	ava49_06466
DNA-binding transcriptional regulator EnvR	aau2_05791	aba5_09038	aken57_05163	ale56_00397	ame18_04324	ame19_07036	ame20_01605	ame21_03445	ame22_03433	ame23_03440	ame24_03438	apr33_06357	ari37_06436	ato48_05573	ava50_08396	ava49_07164
Bacterial extracellular solute-binding proteins, family 3	aau2_05801	aba5_09027	aken57_08770	ale56_04929	ame18_04313	ame19_07047	ame20_01594	ame21_03434	ame22_03422	ame23_03429	ame24_03427	apr33_06346	ari37_06425	ato48_05584	ava50_01522	ava49_07153
Phthiodiolone/phenolphthiodiolone dimycocerosates ketoreductase	aau2_05816	aba5_09015	aken57_05531	ale56_08147	ame18_04301	ame19_07059	ame20_01582	ame21_03422	ame22_03410	ame23_03417	ame24_03415	apr33_06332	ari37_06414	ato48_05600	ava50_02547	ava49_07138
hypothetical protein	aau2_05848	aba5_08890	aken57_09172	ale56_07968	ame18_05556	ame19_02631	ame20_04694	ame21_03240	ame22_03229	ame23_03235	ame24_03233	apr33_06283	ari37_01368	ato48_03576	ava50_03284	ava49_06503
Extracellular exo-alpha-L-arabinofuranosidase precursor	aau2_05968	aba5_09289	aken57_07992	ale56_04048	ame18_04247	ame19_07113	ame20_04808	ame21_03369	ame22_03358	ame23_03364	ame24_03362	apr33_09387	ari37_04358	ato48_05833	ava50_07262	ava49_04684
Bacterial low temperature requirement A protein (LtrA)	aau2_06016	aba5_08971	aken57_09407	ale56_00237	ame18_04257	ame19_07103	ame20_01539	ame21_03379	ame22_03368	ame23_03374	ame24_03372	apr33_06080	ari37_06367	ato48_05819	ava50_00689	ava49_07089
hypothetical protein	aau2_06406	aba5_02112	aken57_03505	ale56_02411	ame18_01631	ame19_09432	ame20_08082	ame21_05976	ame22_05961	ame23_05966	ame24_05962	apr33_08431	ari37_01845	ato48_06253	ava50_01936	ava49_05784
ABC-2 family transporter protein	aau2_06408	aba5_02114	aken57_07463	ale56_02408	ame18_01623	ame19_09440	ame20_08090	ame21_05984	ame22_05969	ame23_05974	ame24_05970	apr33_08434	ari37_01853	ato48_06261	ava50_05010	ava49_05776
Oxygen regulatory protein NreC	aau2_06416	aba5_02121	aken57_07472	ale56_08454	ame18_00939	ame19_09448	ame20_02792	ame21_05992	ame22_05977	ame23_05982	ame24_05978	apr33_08443	ari37_00161	ato48_06269	ava50_05020	ava49_05766
Endo-1,4-beta-xylanase A precursor	aau2_06441	aba5_02139	aken57_01039	ale56_05333	ame18_00960	ame19_09469	ame20_02771	ame21_06013	ame22_05998	ame23_06003	ame24_05999	apr33_08471	ari37_00140	ato48_06291	ava50_00783	ava49_05741
STAS domain protein	aau2_06477	aba5_02175	aken57_02387	ale56_09186	ame18_01008	ame19_09517	ame20_02723	ame21_06061	ame22_06046	ame23_06051	ame24_06047	apr33_08520	ari37_00102	ato48_06325	ava50_06316	ava49_05699
hypothetical protein	aau2_06493	aba5_02192	aken57_07614	ale56_07409	ame18_01029	ame19_09538	ame20_02702	ame21_06082	ame22_06067	ame23_06072	ame24_06068	apr33_08551	ari37_00086	ato48_06344	ava50_00237	ava49_05677
Glyoxalase-like domain protein	aau2_06881	aba5_07348	aken57_02286	ale56_08533	ame18_06024	ame19_02162	ame20_09524	ame21_02770	ame22_02760	ame23_02766	ame24_02761	apr33_01884	ari37_03422	ato48_03124	ava50_02375	ava49_03991
hypothetical protein	aau2_06950	aba5_07267	aken57_00173	ale56_02196	ame18_06105	ame19_02081	ame20_05162	ame21_02689	ame22_02678	ame23_02685	ame24_02680	apr33_01809	ari37_03340	ato48_03038	ava50_04499	ava49_04071
hypothetical protein	aau2_07489	aba5_06719	aken57_09531	ale56_04185	ame18_03752	ame19_01384	ame20_06299	ame21_02126	ame22_02115	ame23_02122	ame24_02116	apr33_04623	ari37_00535	ato48_02469	ava50_01067	ava49_03739
Daunorubicin/doxorubicin resistance ABC transporter permease protein DrrB	aau2_07513	aba5_06693	aken57_05682	ale56_04211	ame18_03782	ame19_01414	ame20_06269	ame21_02096	ame22_02085	ame23_02092	ame24_02086	apr33_04653	ari37_06568	ato48_02440	ava50_00582	ava49_03764
Demethylrebeccamycin-D-glucose O-methyltransferase	aau2_07527	aba5_06678	aken57_09479	ale56_02669	ame18_03799	ame19_01431	ame20_06252	ame21_02079	ame22_02069	ame23_02076	ame24_02069	apr33_04671	ari37_06588	ato48_02422	ava50_02685	ava49_03785
putative ECF RNA polymerase sigma factor SigI	aau2_07619	aba5_06585	aken57_01090	ale56_09875	ame18_04548	ame19_09018	ame20_02947	ame21_01984	ame22_01974	ame23_01981	ame24_01974	apr33_04755	ari37_02949	ato48_02338	ava50_05513	ava49_03865
Alpha-galactosidase A precursor	aau2_07796	aba5_06400	aken57_03358	ale56_03193	ame18_09253	ame19_04289	ame20_09587	ame21_01791	ame22_01781	ame23_01788	ame24_01781	apr33_04953	ari37_03135	ato48_02142	ava50_04386	ava49_04975
hypothetical protein	aau2_07828	aba5_06371	aken57_01498	ale56_01180	ame18_01130	ame19_03214	ame20_09557	ame21_01761	ame22_01751	ame23_01758	ame24_01751	apr33_04986	ari37_03165	ato48_02112	ava50_07359	ava49_05005
Nuclease SbcCD subunit D	aau2_07830	aba5_06369	aken57_01500	ale56_01653	ame18_01132	ame19_03216	ame20_09555	ame21_01759	ame22_01749	ame23_01756	ame24_01748	apr33_04988	ari37_03167	ato48_02110	ava50_05432	ava49_05007
AAA-like domain protein	aau2_07831	aba5_06368	aken57_01501	ale56_01652	ame18_01133	ame19_03217	ame20_09554	ame21_01758	ame22_01748	ame23_01755	ame24_01747	apr33_04989	ari37_03168	ato48_02109	ava50_05431	ava49_05008
aminoalkylphosphonic acid N-acetyltransferase	aau2_07885	aba5_06317	aken57_05349	ale56_05246	ame18_01186	ame19_03270	ame20_04212	ame21_01705	ame22_01695	ame23_01702	ame24_01694	apr33_08819	ari37_03220	ato48_02039	ava50_02942	ava49_05060
anhydro-N-acetylmuramic acid kinase	aau2_07938	aba5_06272	aken57_03593	ale56_08493	ame18_01230	ame19_03314	ame20_04256	ame21_01660	ame22_01651	ame23_01658	ame24_01650	apr33_08758	ari37_03260	ato48_01994	ava50_00760	ava49_05102
hypothetical protein	aau2_08009	aba5_06198	aken57_04089	ale56_00054	ame18_01304	ame19_03388	ame20_04330	ame21_01586	ame22_01577	ame23_01584	ame24_01576	apr33_08671	ari37_04263	ato48_01929	ava50_01045	ava49_08549
Para-nitrobenzyl esterase	aau2_08079	aba5_06125	aken57_06704	ale56_06496	ame18_01794	ame19_04648	ame20_08441	ame21_01512	ame22_01503	ame23_01510	ame24_01502	apr33_00063	ari37_00284	ato48_01858	ava50_00126	ava49_08801
HTH-type transcriptional repressor KstR2	aau2_08175	aba5_05995	aken57_04106	ale56_07128	ame18_08025	ame19_04210	ame20_08390	ame21_01419	ame22_01410	ame23_01417	ame24_01409	apr33_00157	ari37_00202	ato48_01078	ava50_03646	ava49_07382
Putative aliphatic sulfonates-binding protein precursor	aau2_08181	aba5_05989	aken57_07361	ale56_07122	ame18_08019	ame19_04204	ame20_08396	ame21_01413	ame22_01404	ame23_01411	ame24_01403	apr33_00163	ari37_00196	ato48_01084	ava50_02184	ava49_07388
hypothetical protein	aau2_08186	aba5_05987	aken57_07358	ale56_07118	ame18_08017	ame19_04201	ame20_08399	ame21_01410	ame22_01401	ame23_01408	ame24_01400	apr33_00169	ari37_00193	ato48_01090	ava50_01579	ava49_07390
PTS system mannose-specific EIIAB component	aau2_08190	aba5_05983	aken57_07889	ale56_07114	ame18_08013	ame19_04197	ame20_08403	ame21_01406	ame22_01397	ame23_01404	ame24_01396	apr33_00174	ari37_00189	ato48_01096	ava50_08152	ava49_07394
Mannose permease IID component	aau2_08191	aba5_05982	aken57_07888	ale56_07113	ame18_08012	ame19_04196	ame20_08404	ame21_01405	ame22_01396	ame23_01403	ame24_01395	apr33_00175	ari37_00188	ato48_01097	ava50_08153	ava49_07395
PTS system mannose-specific EIIAB component	aau2_08192	aba5_05981	aken57_07887	ale56_07112	ame18_08011	ame19_04195	ame20_08405	ame21_01404	ame22_01395	ame23_01402	ame24_01394	apr33_00176	ari37_00187	ato48_01098	ava50_03386	ava49_07396
hypothetical protein	aau2_08463	aba5_05716	aken57_08959	ale56_03435	ame18_08739	ame19_09368	ame20_07953	ame21_01120	ame22_01113	ame23_01119	ame24_01112	apr33_04150	ari37_05076	ato48_01388	ava50_04598	ava49_07974

## Sheet: S4C
Supplementary Table 4C. Genes specific to Group C
Function	1	2	3	4	5	6	7	8
Fatty acyl-CoA reductase	abe6_00164	aci43_00100	aje11_07157	aor30_04727	aor31_05546	aru38_03407	asa39_07396	as44_03076
Putative HTH-type transcriptional regulator/MT0914	abe6_00173	aci43_00111	aje11_07146	aor30_04717	aor31_05536	aru38_03397	asa39_07383	as44_03086
Peptide deformylase	abe6_00224	aci43_00164	aje11_07098	aor30_04659	aor31_01502	aru38_03344	asa39_07302	as44_03138
Alpha/beta hydrolase family protein	abe6_00233	aci43_00176	aje11_07089	aor30_04649	aor31_06717	aru38_03333	asa39_07288	as44_03149
Glyoxalase-like domain protein	abe6_00318	aci43_07419	aje11_07785	aor30_04167	aor31_06163	aru38_09227	asa39_08351	as44_07548
hypothetical protein	abe6_00735	aci43_07864	aje11_04300	aor30_02353	aor31_07732	aru38_01444	asa39_06124	as44_02638
Chitinase precursor	abe6_00971	aci43_05126	aje11_05553	aor30_02568	aor31_04756	aru38_01188	asa39_01504	as44_02376
Helix-turn-helix domain protein	abe6_01095	aci43_04981	aje11_09206	aor30_00132	aor31_02520	aru38_01003	asa39_01840	as44_02204
hypothetical protein	abe6_01268	aci43_03364	aje11_02243	aor30_05833	aor31_04580	aru38_06884	asa39_02023	as44_05767
hypothetical protein	abe6_01407	aci43_01525	aje11_08540	aor30_05783	aor31_07148	aru38_00880	asa39_02098	as44_09006
Signal peptidase I	abe6_02110	aci43_00850	aje11_00135	aor30_06056	aor31_07495	aru38_04295	asa39_02882	as44_09123
putative oxidoreductase/MSMEI_2347	abe6_02124	aci43_07556	aje11_00120	aor30_06072	aor31_07480	aru38_04281	asa39_02437	as44_09138
4-hydroxy-4-methyl-2-oxoglutarate aldolase	abe6_02991	aci43_08250	aje11_06413	aor30_05272	aor31_06110	aru38_00431	asa39_08396	as44_03011
glucans biosynthesis protein	abe6_03011	aci43_00974	aje11_07158	aor30_05294	aor31_02439	aru38_00408	asa39_08377	as44_06736
Sporulation and spore germination	abe6_03358	aci43_05827	aje11_07500	aor30_06604	aor31_05997	aru38_05200	asa39_04841	as44_03652
hypothetical protein	abe6_03364	aci43_05834	aje11_07496	aor30_06610	aor31_06003	aru38_05194	asa39_04832	as44_03646
hypothetical protein	abe6_03380	aci43_05854	aje11_07454	aor30_06795	aor31_07801	aru38_05175	asa39_04810	as44_03627
hypothetical protein	abe6_04419	aci43_00906	aje11_01360	aor30_03772	aor31_06623	aru38_03224	asa39_05403	as44_03240
Transcriptional regulator FurA	abe6_04427	aci43_00919	aje11_07063	aor30_03763	aor31_06636	aru38_03237	asa39_08423	as44_03225
hypothetical protein	abe6_04499	aci43_06019	aje11_07662	aor30_02182	aor31_04300	aru38_00258	asa39_00380	as44_06825
hypothetical protein	abe6_04688	aci43_00438	aje11_04743	aor30_06228	aor31_00875	aru38_02568	asa39_08943	as44_04363
hypothetical protein	abe6_04978	aci43_05414	aje11_02889	aor30_00211	aor31_08434	aru38_02873	asa39_02885	as44_07723
hypothetical protein	abe6_04999	aci43_05058	aje11_02918	aor30_03595	aor31_08459	aru38_02898	asa39_00894	as44_07749
hypothetical protein	abe6_05011	aci43_05036	aje11_02930	aor30_03613	aor31_08483	aru38_02925	asa39_00920	as44_07774
hypothetical protein	abe6_05195	aci43_06084	aje11_07970	aor30_07260	aor31_05482	aru38_08888	asa39_03619	as44_05386
hypothetical protein	abe6_05264	aci43_06834	aje11_08040	aor30_00103	aor31_03617	aru38_08956	asa39_03693	as44_05317
hypothetical protein	abe6_05271	aci43_06827	aje11_08047	aor30_00110	aor31_03610	aru38_08963	asa39_03700	as44_05310
hypothetical protein	abe6_05305	aci43_06281	aje11_06110	aor30_05569	aor31_03568	aru38_05448	asa39_03743	as44_07105
2-acyl-glycerophospho-ethanolamine acyltransferase	abe6_05384	aci43_06879	aje11_06041	aor30_05630	aor31_03504	aru38_05511	asa39_08329	as44_07041
hypothetical protein	abe6_05469	aci43_03542	aje11_08082	aor30_01395	aor31_05599	aru38_05614	asa39_05625	as44_06230
hypothetical protein	abe6_05794	aci43_08280	aje11_03797	aor30_00161	aor31_06317	aru38_07314	asa39_03358	as44_07118
hypothetical protein	abe6_06212	aci43_02592	aje11_04915	aor30_07456	aor31_07337	aru38_07705	asa39_06600	as44_02165
hypothetical protein	abe6_06222	aci43_01224	aje11_04905	aor30_07467	aor31_07348	aru38_07717	asa39_06588	as44_02154
hypothetical protein	abe6_06223	aci43_01223	aje11_04904	aor30_07468	aor31_07349	aru38_07718	asa39_06587	as44_02153
hypothetical protein	abe6_06225	aci43_02605	aje11_04902	aor30_07470	aor31_07351	aru38_07720	asa39_06585	as44_02151
hypothetical protein	abe6_06315	aci43_07466	aje11_04800	aor30_05131	aor31_07449	aru38_07823	asa39_04037	as44_02048
hypothetical protein	abe6_06374	aci43_03887	aje11_04256	aor30_06444	aor31_03163	aru38_07889	asa39_04100	as44_01983
hypothetical protein	abe6_06684	aci43_01125	aje11_02570	aor30_04840	aor31_03394	aru38_08093	asa39_03942	as44_01590
helix-turn-helix protein	abe6_06839	aci43_06220	aje11_02739	aor30_00412	aor31_05324	aru38_08269	asa39_05196	as44_01412
hypothetical protein	abe6_06856	aci43_07019	aje11_02756	aor30_00391	aor31_05305	aru38_08289	asa39_05217	as44_01391
18 kDa heat shock protein	abe6_06902	aci43_04786	aje11_09038	aor30_00342	aor31_05253	aru38_08343	asa39_06898	as44_01338
hypothetical protein	abe6_07213	aci43_02113	aje11_07277	aor30_00627	aor31_00322	aru38_08670	asa39_04210	as44_01009
Acyl-CoA thioesterase 2	abe6_07214	aci43_02114	aje11_07278	aor30_00626	aor31_00323	aru38_08671	asa39_04211	as44_01008
hypothetical protein	abe6_07258	aci43_02161	aje11_07322	aor30_03738	aor31_00368	aru38_08715	asa39_04262	as44_02804
3-demethylubiquinone-9 3-methyltransferase	abe6_07456	aci43_02943	aje11_09231	aor30_07659	aor31_02798	aru38_01951	asa39_00566	as44_00110
Acyl-CoA dehydrogenase	abe6_07464	aci43_02930	aje11_09126	aor30_07652	aor31_02810	aru38_01970	asa39_05459	as44_00119
Acyl-CoA dehydrogenase fadE12	abe6_07465	aci43_02929	aje11_09127	aor30_07651	aor31_02811	aru38_01971	asa39_05460	as44_00120
Lipid II flippase FtsW	abe6_07481	aci43_02910	aje11_09148	aor30_07633	aor31_02830	aru38_01990	asa39_01819	as44_00138
NAD dependent epimerase/dehydratase family protein	abe6_07582	aci43_00590	aje11_00779	aor30_01676	aor31_03936	aru38_02169	asa39_08002	as44_00226
hypothetical protein	abe6_07773	aci43_04061	aje11_06589	aor30_06697	aor31_01132	aru38_03981	asa39_07796	as44_00428
hypothetical protein	abe6_07877	aci43_04520	aje11_06704	aor30_01084	aor31_04234	aru38_03858	asa39_07690	as44_00551
mce related protein	abe6_07987	aci43_06487	aje11_01342	aor30_03407	aor31_04098	aru38_03727	asa39_07557	as44_00682

## Sheet: S4D
Supplementary Table 4D. Genes specific to Group D
Function	1	2	3	4	5	6	7
hypothetical protein	amet25_00028	amet26_01955	arun53_05565	as41_07058	athe54_04032	athe55_03217	ath47_03727
Pentalenic acid synthase	amet25_00057	amet26_01984	arun53_05874	as41_07087	athe54_04759	athe55_03849	ath47_03697
hypothetical protein	amet25_00120	amet26_02047	arun53_05070	as41_07152	athe54_05390	athe55_04571	ath47_03609
Bacterial regulatory proteins, luxR family	amet25_00121	amet26_02048	arun53_05069	as41_07153	athe54_05389	athe55_04570	ath47_03608
Xylose isomerase-like TIM barrel	amet25_00122	amet26_02049	arun53_05068	as41_07154	athe54_05388	athe55_04569	ath47_03607
transcriptional regulator NarL	amet25_00126	amet26_02053	arun53_05064	as41_07158	athe54_05384	athe55_04565	ath47_03603
hypothetical protein	amet25_00137	amet26_02064	arun53_05062	as41_07168	athe54_05382	athe55_04563	ath47_03593
hypothetical protein	amet25_00142	amet26_02069	arun53_05057	as41_07173	athe54_05377	athe55_04558	ath47_03588
putative oxidoreductase ORF5 in fasciation locus	amet25_00143	amet26_02070	arun53_06479	as41_07174	athe54_06483	athe55_06206	ath47_03587
hypothetical protein	amet25_00160	amet26_02087	arun53_06494	as41_07191	athe54_06498	athe55_06221	ath47_03571
Soluble epoxide hydrolase	amet25_00170	amet26_02097	arun53_06609	as41_07207	athe54_06576	athe55_06368	ath47_03554
N-acyl homoserine lactonase	amet25_00175	amet26_02102	arun53_06616	as41_07214	athe54_06583	athe55_06375	ath47_03549
Zinc ribbon domain protein	amet25_00177	amet26_02104	arun53_06618	as41_07216	athe54_06585	athe55_06377	ath47_03547
2,5-dichloro-2,5-cyclohexadiene-1,4-diol dehydrogenase	amet25_00193	amet26_02120	arun53_01349	as41_07231	athe54_03218	athe55_02838	ath47_03531
Acryloyl-CoA reductase (NADH)	amet25_00194	amet26_02121	arun53_01348	as41_07232	athe54_03217	athe55_02839	ath47_03530
Putative aminoglycoside phosphotransferase	amet25_00195	amet26_02122	arun53_01347	as41_07233	athe54_03216	athe55_02840	ath47_03529
hypothetical protein	amet25_00197	amet26_02124	arun53_01345	as41_07235	athe54_03214	athe55_02842	ath47_03527
hypothetical protein	amet25_00198	amet26_02125	arun53_01344	as41_07236	athe54_03213	athe55_02843	ath47_03526
HTH-type transcriptional repressor YcgE	amet25_00223	amet26_02150	arun53_01315	as41_07262	athe54_03185	athe55_02871	ath47_03499
hypothetical protein	amet25_00242	amet26_02169	arun53_01299	as41_07281	athe54_03169	athe55_02887	ath47_03481
GDSL-like Lipase/Acylhydrolase	amet25_00276	amet26_02203	arun53_06823	as41_07313	athe54_03958	athe55_04802	ath47_03445
hypothetical protein	amet25_00277	amet26_02204	arun53_06822	as41_07314	athe54_03959	athe55_04803	ath47_03444
Dihydrolipoyllysine-residue acetyltransferase component of acetoin cleaving system	amet25_00282	amet26_02209	arun53_06816	as41_07320	athe54_03965	athe55_04809	ath47_03438
ECF RNA polymerase sigma factor SigD	amet25_00291	amet26_02218	arun53_05750	as41_04732	athe54_03972	athe55_04816	ath47_03428
hypothetical protein	amet25_00323	amet26_02250	arun53_05184	as41_04777	athe54_04008	athe55_06075	ath47_03383
Anti-sigma-F factor antagonist RsfB	amet25_00330	amet26_02257	arun53_05177	as41_04784	athe54_04015	athe55_06082	ath47_03376
Inner membrane protein YdcO	amet25_00349	amet26_02276	arun53_06578	as41_04836	athe54_02353	athe55_04009	ath47_03318
hypothetical protein	amet25_00352	amet26_02279	arun53_05944	as41_04854	athe54_02334	athe55_03604	ath47_03302
hypothetical protein	amet25_00365	amet26_02292	arun53_05932	as41_00629	athe54_02321	athe55_03591	ath47_03286
hypothetical protein	amet25_00384	amet26_02311	arun53_00570	as41_00646	athe54_02303	athe55_03573	ath47_03266
Exo-alpha-(1->6)-L-arabinopyranosidase	amet25_00405	amet26_02332	arun53_00549	as41_01369	athe54_02282	athe55_03552	ath47_03248
Bacterial regulatory proteins, tetR family	amet25_00406	amet26_02333	arun53_00548	as41_01370	athe54_02918	athe55_06859	ath47_03247
ANTAR domain protein	amet25_00424	amet26_02351	arun53_00532	as41_01389	athe54_02901	athe55_00688	ath47_03228
hypothetical protein	amet25_00443	amet26_02370	arun53_00512	as41_00255	athe54_02881	athe55_00708	ath47_03202
NDMA-dependent alcohol dehydrogenase	amet25_00497	amet26_02424	arun53_00440	as41_02786	athe54_03469	athe55_00783	ath47_03108
hypothetical protein	amet25_00570	amet26_02497	arun53_06061	as41_05008	athe54_06128	athe55_05860	ath47_02980
hypothetical protein	amet25_00626	amet26_02553	arun53_05993	as41_01470	athe54_05915	athe55_05537	ath47_02885
isochorismate-pyruvate lyase	amet25_00670	amet26_02597	arun53_06557	as41_01513	athe54_05569	athe55_04997	ath47_02839
hypothetical protein	amet25_00716	amet26_02643	arun53_04348	as41_00372	athe54_05605	athe55_03516	ath47_02792
hypothetical protein	amet25_00769	amet26_02696	arun53_06426	as41_00283	athe54_06375	athe55_05473	ath47_02739
Non-heme chloroperoxidase	amet25_00786	amet26_02713	arun53_06778	as41_00209	athe54_06739	athe55_05454	ath47_02715
Anti-sigma-F factor antagonist RsfB	amet25_00831	amet26_02758	arun53_04850	as41_03244	athe54_04985	athe55_04111	ath47_02673
DNA-binding transcriptional activator MhpR	amet25_00832	amet26_02759	arun53_04849	as41_03245	athe54_04986	athe55_04112	ath47_02672
Carbohydrate binding module (family 6)	amet25_00962	amet26_02889	arun53_01201	as41_03111	athe54_05500	athe55_04850	ath47_02431
Xylose isomerase-like TIM barrel	amet25_00964	amet26_02891	arun53_01202	as41_03110	athe54_05501	athe55_04851	ath47_02430
hypothetical protein	amet25_00989	amet26_02916	arun53_01233	as41_03077	athe54_06280	athe55_06004	ath47_02394
hypothetical protein	amet25_00990	amet26_02917	arun53_01234	as41_03076	athe54_06279	athe55_06003	ath47_02393
Lipase 2 precursor	amet25_01107	amet26_03445	arun53_00636	as41_03867	athe54_00368	athe55_00079	ath47_01297
hypothetical protein	amet25_01110	amet26_03448	arun53_00635	as41_03864	athe54_00367	athe55_00078	ath47_01299
LGFP repeat protein	amet25_01126	amet26_03464	arun53_00620	as41_03842	athe54_00352	athe55_00063	ath47_01317
acid-resistance membrane protein	amet25_01138	amet26_03476	arun53_05370	as41_00297	athe54_03043	athe55_02087	ath47_01334
hypothetical protein	amet25_01168	amet26_03506	arun53_00222	as41_04482	athe54_03062	athe55_02068	ath47_01367
hypothetical protein	amet25_01193	amet26_03531	arun53_00211	as41_05879	athe54_03073	athe55_02057	ath47_01393
Glutamine-dependent NAD(+) synthetase	amet25_01194	amet26_03532	arun53_00210	as41_05878	athe54_03074	athe55_02056	ath47_01394
hypothetical protein	amet25_01257	amet26_03595	arun53_00145	as41_05805	athe54_00842	athe55_02136	ath47_01462
hypothetical protein	amet25_01265	amet26_03603	arun53_00132	as41_05795	athe54_00828	athe55_02150	ath47_01470
NADH dehydrogenase-like protein	amet25_01271	amet26_03609	arun53_00128	as41_05790	athe54_00824	athe55_02154	ath47_01475
Tyrosine recombinase XerC	amet25_01275	amet26_03613	arun53_00122	as41_05786	athe54_00818	athe55_02160	ath47_01479
Chromosome partition protein Smc	amet25_01276	amet26_03614	arun53_00120	as41_05785	athe54_00816	athe55_02162	ath47_01480
hypothetical protein	amet25_01281	amet26_03619	arun53_00111	as41_05780	athe54_00807	athe55_02171	ath47_01487
hypothetical protein	amet25_01296	amet26_03634	arun53_00100	as41_05763	athe54_00796	athe55_02182	ath47_01505
hypothetical protein	amet25_01391	amet26_03729	arun53_00012	as41_00329	athe54_00705	athe55_03337	ath47_01610
3-phenylpropionate/cinnamic acid dioxygenase subunit alpha	amet25_01397	amet26_03735	arun53_01381	as41_04577	athe54_01265	athe55_02534	ath47_01618
HEAT repeat protein	amet25_01520	amet26_03858	arun53_01465	as41_05932	athe54_01348	athe55_03398	ath47_01709
Transcriptional regulatory protein DevR (DosR)	amet25_01525	amet26_03863	arun53_01468	as41_03571	athe54_01351	athe55_03401	ath47_01713
Isonitrile hydratase	amet25_01557	amet26_03895	arun53_01480	as41_00740	athe54_01362	athe55_03412	ath47_01740
Bacterial regulatory proteins, tetR family	amet25_01579	amet26_03918	arun53_01492	as41_03772	athe54_01374	athe55_03424	ath47_01762
hypothetical protein	amet25_01601	amet26_03940	arun53_05886	as41_03787	athe54_00301	athe55_00012	ath47_01781
hypothetical protein	amet25_01609	amet26_03948	arun53_00582	as41_03790	athe54_00315	athe55_00026	ath47_01784
Bacterial regulatory proteins, tetR family	amet25_01617	amet26_03956	arun53_00589	as41_03796	athe54_00321	athe55_00032	ath47_01791
Hydroxymethylglutaryl-CoA lyase YngG	amet25_01637	amet26_03976	arun53_00600	as41_03814	athe54_00332	athe55_00043	ath47_01808
SnoaL-like polyketide cyclase	amet25_01821	amet26_04160	arun53_05844	as41_08170	athe54_06009	athe55_05609	ath47_00343
hypothetical protein	amet25_01850	amet26_04189	arun53_04700	as41_08230	athe54_06702	athe55_06541	ath47_00296
hypothetical protein	amet25_01851	amet26_04190	arun53_04701	as41_08231	athe54_06701	athe55_06540	ath47_00295
Nitroreductase family protein	amet25_01870	amet26_04209	arun53_05247	as41_08252	athe54_06178	athe55_04224	ath47_00276
Sporulation and spore germination	amet25_01956	amet26_04295	arun53_02640	as41_01207	athe54_02139	athe55_02018	ath47_00187
hypothetical protein	amet25_02073	amet26_04412	arun53_03141	as41_02244	athe54_03523	athe55_02682	ath47_00071
hypothetical protein	amet25_02077	amet26_04416	arun53_03138	as41_02247	athe54_03526	athe55_02679	ath47_00068
Histidine kinase	amet25_02083	amet26_04422	arun53_03135	as41_02252	athe54_03529	athe55_02676	ath47_00062
hypothetical protein	amet25_02126	amet26_04465	arun53_06971	as41_02296	athe54_05375	athe55_04473	ath47_00016
Anti-sigma-F factor antagonist RsfA	amet25_02132	amet26_04471	arun53_04430	as41_02305	athe54_05365	athe55_04483	ath47_00007
Anti-sigma-F factor antagonist RsfB	amet25_02143	amet26_04482	arun53_04436	as41_00839	athe54_05358	athe55_04490	ath47_08552
hypothetical protein	amet25_02146	amet26_04485	arun53_04439	as41_00842	athe54_05355	athe55_04493	ath47_08549
L-cystine import ATP-binding protein TcyC	amet25_02200	amet26_04539	arun53_04478	as41_00970	athe54_04401	athe55_06286	ath47_08495
N-(5-phosphoribosyl)anthranilate isomerase	amet25_02219	amet26_04559	arun53_05606	as41_01007	athe54_04372	athe55_05189	ath47_08458
ANTAR domain protein	amet25_02222	amet26_04562	arun53_05603	as41_01009	athe54_04369	athe55_05186	ath47_08456
hypothetical protein	amet25_02223	amet26_04563	arun53_05602	as41_00590	athe54_04368	athe55_05185	ath47_08455
Demethylmenaquinone methyltransferase	amet25_02230	amet26_04571	arun53_04490	as41_00599	athe54_02484	athe55_03614	ath47_08446
hypothetical protein	amet25_02244	amet26_04585	arun53_04502	as41_00612	athe54_02496	athe55_03626	ath47_08432
Hydroxycinnamoyl-CoA hydratase-lyase	amet25_02260	amet26_04601	arun53_04516	as41_00930	athe54_02510	athe55_03640	ath47_08412
Bacterial regulatory proteins, tetR family	amet25_02265	amet26_04606	arun53_04525	as41_00935	athe54_02519	athe55_03649	ath47_08407
hypothetical protein	amet25_02279	amet26_04620	arun53_01927	as41_00960	athe54_02537	athe55_06467	ath47_08381
hypothetical protein	amet25_02280	amet26_04621	arun53_01926	as41_00961	athe54_02538	athe55_06468	ath47_08380
hypothetical protein	amet25_02281	amet26_04622	arun53_01925	as41_00962	athe54_02539	athe55_06469	ath47_08379
Anti-sigma-F factor antagonist RsfB	amet25_02287	amet26_04628	arun53_01905	as41_00108	athe54_02558	athe55_06176	ath47_08375
Arylesterase	amet25_02297	amet26_04638	arun53_01884	as41_00029	athe54_04097	athe55_06194	ath47_08357
hypothetical protein	amet25_02298	amet26_04639	arun53_01883	as41_00030	athe54_04098	athe55_06193	ath47_08356
hypothetical protein	amet25_02596	amet26_04937	arun53_03198	as41_03762	athe54_02272	athe55_01406	ath47_08167
hypothetical protein	amet25_02721	amet26_05062	arun53_01049	as41_04941	athe54_02450	athe55_01441	ath47_08032
hypothetical protein	amet25_02822	amet26_05163	arun53_03589	as41_02585	athe54_03251	athe55_01923	ath47_07930
HTH-type transcriptional regulator BenM	amet25_02877	amet26_05218	arun53_07014	as41_04009	athe54_04563	athe55_07044	ath47_07878
hypothetical protein	amet25_02880	amet26_05221	arun53_04807	as41_04012	athe54_04560	athe55_03946	ath47_07875
hypothetical protein	amet25_02918	amet26_05259	arun53_04772	as41_04049	athe54_04527	athe55_03979	ath47_07838
hypothetical protein	amet25_02967	amet26_05308	arun53_06799	as41_04107	athe54_06846	athe55_06595	ath47_07788
Putative non-heme bromoperoxidase BpoC	amet25_03057	amet26_05397	arun53_02232	as41_01062	athe54_03146	athe55_02231	ath47_07690
short chain dehydrogenase	amet25_03059	amet26_05399	arun53_02234	as41_01064	athe54_03148	athe55_02229	ath47_07688
ADP-ribosylglycohydrolase	amet25_03060	amet26_05400	arun53_02235	as41_01065	athe54_03149	athe55_02228	ath47_07687
Acyl-CoA thioesterase 2	amet25_03103	amet26_05443	arun53_06626	as41_00707	athe54_04864	athe55_03898	ath47_07645
hypothetical protein	amet25_03110	amet26_05450	arun53_06631	as41_00711	athe54_04859	athe55_03903	ath47_07639
HTH-type transcriptional regulator LrpC	amet25_03124	amet26_05464	arun53_05699	as41_00725	athe54_04845	athe55_03917	ath47_07625
Cypemycin methyltransferase	amet25_03127	amet26_05467	arun53_05702	as41_01525	athe54_04842	athe55_03920	ath47_07622
Transcriptional regulatory protein DegU	amet25_03144	amet26_05484	arun53_05715	as41_01540	athe54_04827	athe55_03934	ath47_07601
hypothetical protein	amet25_03146	amet26_05486	arun53_05717	as41_01542	athe54_04825	athe55_03936	ath47_07599
Peptide deformylase	amet25_03153	amet26_05493	arun53_05724	as41_01551	athe54_04818	athe55_03943	ath47_07593
hypothetical protein	amet25_03172	amet26_05512	arun53_05654	as41_01572	athe54_01529	athe55_01820	ath47_07571
hypothetical protein	amet25_03174	amet26_05514	arun53_05652	as41_01574	athe54_01527	athe55_01822	ath47_07569
Anti-sigma-B factor antagonist	amet25_03175	amet26_05515	arun53_05651	as41_01575	athe54_01526	athe55_01823	ath47_07568
hypothetical protein	amet25_03183	amet26_05523	arun53_05642	as41_01585	athe54_01517	athe55_01832	ath47_07560
mce related protein	amet25_03227	amet26_05567	arun53_05675	as41_00136	athe54_06956	athe55_06870	ath47_07449
hypothetical protein	amet25_03238	amet26_05578	arun53_05670	as41_00145	athe54_06951	athe55_06875	ath47_07442
hypothetical protein	amet25_03250	amet26_05590	arun53_05773	as41_01017	athe54_05797	athe55_05310	ath47_07432
hypothetical protein	amet25_03383	amet26_05723	arun53_02404	as41_01666	athe54_01095	athe55_00553	ath47_07317
hypothetical protein	amet25_03390	amet26_05730	arun53_02397	as41_01673	athe54_01102	athe55_00560	ath47_07310
NmrA-like family protein	amet25_03407	amet26_05747	arun53_06993	as41_01688	athe54_01113	athe55_00571	ath47_07293
Cell wall synthesis protein Wag31	amet25_03414	amet26_05754	arun53_03419	as41_01694	athe54_01121	athe55_00579	ath47_07287
UDP-glucose 4-epimerase	amet25_03427	amet26_05767	arun53_03408	as41_03393	athe54_01133	athe55_00591	ath47_07274
Anti-sigma-F factor antagonist RsfA	amet25_03502	amet26_05842	arun53_06513	as41_00566	athe54_01193	athe55_00651	ath47_07191
hypothetical protein	amet25_03529	amet26_05869	arun53_05972	as41_00465	athe54_01217	athe55_00675	ath47_07164
hypothetical protein	amet25_03538	amet26_05878	arun53_05963	as41_00475	athe54_01226	athe55_06293	ath47_07154
Erythromycin esterase	amet25_03541	amet26_05881	arun53_05960	as41_00478	athe54_01229	athe55_06296	ath47_07151
hypothetical protein	amet25_03580	amet26_05920	arun53_02510	as41_02053	athe54_05644	athe55_06029	ath47_07112
6-hydroxy-D-nicotine oxidase	amet25_03634	amet26_05974	arun53_02563	as41_03142	athe54_03799	athe55_02993	ath47_07054
hypothetical protein	amet25_03635	amet26_05975	arun53_02564	as41_03143	athe54_03798	athe55_02992	ath47_07053
hypothetical protein	amet25_03637	amet26_05977	arun53_02565	as41_03144	athe54_03796	athe55_02990	ath47_07052
hypothetical protein	amet25_03638	amet26_05978	arun53_02352	as41_06011	athe54_05684	athe55_05034	ath47_07051
hypothetical protein	amet25_03645	amet26_05985	arun53_02571	as41_03151	athe54_03790	athe55_02984	ath47_07043
RNA polymerase sigma-E factor	amet25_03646	amet26_05986	arun53_02572	as41_03152	athe54_03789	athe55_02983	ath47_07042
5-methyltetrahydropteroyltriglutamate-- homocysteine methyltransferase	amet25_03682	amet26_06022	arun53_05578	as41_03187	athe54_05729	athe55_05133	ath47_07006
General stress protein 69	amet25_03771	amet26_06111	arun53_05467	as41_02105	athe54_04429	athe55_03749	ath47_06915
hypothetical protein	amet25_03772	amet26_06112	arun53_05466	as41_02106	athe54_04430	athe55_03748	ath47_06914
hypothetical protein	amet25_03773	amet26_06113	arun53_05465	as41_02107	athe54_04431	athe55_03747	ath47_06913
High-affinity nickel transport protein	amet25_03775	amet26_06115	arun53_05463	as41_02109	athe54_04433	athe55_03745	ath47_06911
hypothetical protein	amet25_03821	amet26_06161	arun53_00383	as41_02159	athe54_06817	athe55_06726	ath47_06865
Nitrate regulatory protein	amet25_03822	amet26_06162	arun53_00382	as41_02160	athe54_06816	athe55_06727	ath47_06864
hypothetical protein	amet25_03823	amet26_06163	arun53_00381	as41_02161	athe54_06815	athe55_06728	ath47_06863
hypothetical protein	amet25_03827	amet26_06167	arun53_00366	as41_04255	athe54_00504	athe55_01205	ath47_06849
Diol dehydratase-reactivating factor alpha subunit	amet25_03828	amet26_06168	arun53_00365	as41_04256	athe54_00505	athe55_01206	ath47_06848
Propanediol dehydratase medium subunit	amet25_03829	amet26_06169	arun53_00364	as41_04257	athe54_00506	athe55_01207	ath47_06847
Glycerol dehydratase large subunit	amet25_03830	amet26_06170	arun53_00363	as41_04258	athe54_00507	athe55_01208	ath47_06846
Propanediol dehydratase small subunit	amet25_03831	amet26_06171	arun53_00362	as41_04259	athe54_00508	athe55_01209	ath47_06845
Acetyl-coenzyme A synthetase	amet25_03836	amet26_06176	arun53_00357	as41_04264	athe54_00513	athe55_01214	ath47_06840
hypothetical protein	amet25_03876	amet26_06216	arun53_00326	as41_04299	athe54_00579	athe55_01280	ath47_06807
Cytochrome P450-SU1	amet25_03878	amet26_06218	arun53_00325	as41_04300	athe54_00580	athe55_01281	ath47_06806
hypothetical protein	amet25_03897	amet26_06237	arun53_00308	as41_04318	athe54_00597	athe55_01298	ath47_06788
hypothetical protein	amet25_03928	amet26_06268	arun53_00282	as41_04344	athe54_00623	athe55_02377	ath47_06761
hypothetical protein	amet25_04075	amet26_06415	arun53_03895	as41_02007	athe54_03566	athe55_02837	ath47_06701
hypothetical protein	amet25_04081	amet26_06421	arun53_03901	as41_02013	athe54_03572	athe55_02831	ath47_06695
hypothetical protein	amet25_04116	amet26_06456	arun53_03937	as41_06760	athe54_03608	athe55_02795	ath47_06658
hypothetical protein	amet25_04294	amet26_06696	arun53_03510	as41_06889	athe54_04657	athe55_04877	ath47_06543
Pca regulon regulatory protein	amet25_04298	amet26_06700	arun53_03506	as41_06893	athe54_04661	athe55_04873	ath47_06539
L-threonine 3-dehydrogenase	amet25_04299	amet26_06701	arun53_03505	as41_06894	athe54_04662	athe55_04872	ath47_06538
hypothetical protein	amet25_04316	amet26_06718	arun53_02798	as41_06908	athe54_00907	athe55_01188	ath47_06523
hypothetical protein	amet25_04323	amet26_06725	arun53_02805	as41_06915	athe54_00914	athe55_01181	ath47_06516
3-alpha-hydroxysteroid dehydrogenase/carbonyl reductase	amet25_04354	amet26_06756	arun53_02836	as41_06950	athe54_00943	athe55_01151	ath47_06485
SnoaL-like polyketide cyclase	amet25_04379	amet26_06781	arun53_02859	as41_06979	athe54_00966	athe55_01128	ath47_06360
hypothetical protein	amet25_04584	amet26_06986	arun53_06651	as41_05306	athe54_06568	athe55_06392	ath47_06158
hypothetical protein	amet25_04585	amet26_06987	arun53_03004	as41_05325	athe54_01946	athe55_06492	ath47_06139
hypothetical protein	amet25_04612	amet26_07014	arun53_03039	as41_05358	athe54_02012	athe55_04677	ath47_06096
hypothetical protein	amet25_04618	amet26_07020	arun53_03044	as41_05365	athe54_02017	athe55_04672	ath47_06090
hypothetical protein	amet25_04632	amet26_07034	arun53_03053	as41_05378	athe54_02026	athe55_02959	ath47_06076
hypothetical protein	amet25_04636	amet26_07038	arun53_03057	as41_05382	athe54_02030	athe55_02955	ath47_06069
hypothetical protein	amet25_04707	amet26_07109	arun53_06297	as41_05456	athe54_03933	athe55_03121	ath47_06012
Putative tartrate transporter	amet25_04779	amet26_07181	arun53_06195	as41_02187	athe54_05832	athe55_05233	ath47_05937
hypothetical protein	amet25_04874	amet26_07276	arun53_01733	as41_01349	athe54_00044	athe55_02337	ath47_05842
hypothetical protein	amet25_04893	amet26_07295	arun53_01752	as41_00532	athe54_00063	athe55_02356	ath47_05823
hypothetical protein	amet25_04898	amet26_07300	arun53_01758	as41_00539	athe54_00069	athe55_02362	ath47_05817
hypothetical protein	amet25_04899	amet26_07301	arun53_01759	as41_00540	athe54_00070	athe55_02363	ath47_05816
hypothetical protein	amet25_04900	amet26_07302	arun53_01760	as41_00541	athe54_00071	athe55_02364	ath47_05815
hypothetical protein	amet25_04938	amet26_07340	arun53_01799	as41_07335	athe54_00109	athe55_03775	ath47_05775
hypothetical protein	amet25_04939	amet26_07341	arun53_01800	as41_07336	athe54_00110	athe55_03774	ath47_05774
hypothetical protein	amet25_04956	amet26_07358	arun53_01948	as41_07354	athe54_00128	athe55_00529	ath47_05756
Threonine/homoserine exporter RhtA	amet25_04984	amet26_00004	arun53_01976	as41_07381	athe54_00155	athe55_00502	ath47_05728
hypothetical protein	amet25_05106	amet26_00126	arun53_00769	as41_07485	athe54_01683	athe55_00201	ath47_05629
hypothetical protein	amet25_05109	amet26_00129	arun53_00773	as41_07489	athe54_01687	athe55_00205	ath47_05626
hypothetical protein	amet25_05113	amet26_00133	arun53_00777	as41_07493	athe54_01691	athe55_00209	ath47_05622
hypothetical protein	amet25_05116	amet26_00136	arun53_00780	as41_07496	athe54_01694	athe55_00212	ath47_05619
hypothetical protein	amet25_05160	amet26_00180	arun53_00823	as41_07541	athe54_01737	athe55_00255	ath47_05574
hypothetical protein	amet25_05185	amet26_00205	arun53_00845	as41_07564	athe54_01759	athe55_00277	ath47_05550
Putative nitroreductase/MT1609	amet25_05239	amet26_00259	arun53_05264	as41_07624	athe54_06402	athe55_04207	ath47_05493
hypothetical protein	amet25_05259	amet26_00279	arun53_00925	as41_07644	athe54_05269	athe55_00354	ath47_05455
hypothetical protein	amet25_05267	amet26_00287	arun53_00933	as41_07652	athe54_05261	athe55_00362	ath47_05446
hypothetical protein	amet25_05296	amet26_00316	arun53_06208	as41_07702	athe54_06291	athe55_07049	ath47_05398
Purine efflux pump PbuE	amet25_05300	amet26_00320	arun53_05537	as41_07707	athe54_06947	athe55_06862	ath47_05393
Copper-exporting P-type ATPase A	amet25_05305	amet26_00325	arun53_05532	as41_07713	athe54_06942	athe55_06867	ath47_05388
hypothetical protein	amet25_05315	amet26_00335	arun53_05523	as41_07722	athe54_03767	athe55_05806	ath47_05379
hypothetical protein	amet25_05345	amet26_00365	arun53_05803	as41_04130	athe54_03734	athe55_06705	ath47_05348
hypothetical protein	amet25_05385	amet26_00405	arun53_04003	as41_04194	athe54_04273	athe55_03041	ath47_05283
hypothetical protein	amet25_05455	amet26_00475	arun53_04070	as41_06233	athe54_02705	athe55_01659	ath47_05212
hypothetical protein	amet25_05466	amet26_00486	arun53_04081	as41_06244	athe54_02694	athe55_01670	ath47_05201
hypothetical protein	amet25_05495	amet26_00515	arun53_06156	as41_06272	athe54_02665	athe55_01699	ath47_05173
hypothetical protein	amet25_05498	amet26_00518	arun53_06159	as41_06275	athe54_02662	athe55_01702	ath47_05170
D-glycero-alpha-D-manno-heptose 1-phosphate guanylyltransferase	amet25_05528	amet26_00548	arun53_04119	as41_06306	athe54_05698	athe55_03170	ath47_05138
ATP synthase subunit b	amet25_05579	amet26_00599	arun53_04093	as41_06335	athe54_07057	athe55_03196	ath47_05109
Transcriptional regulatory protein DevR (DosR)	amet25_05611	amet26_00631	arun53_02155	as41_06370	athe54_02656	athe55_01709	ath47_05073
hypothetical protein	amet25_05650	amet26_00670	arun53_02114	as41_06409	athe54_02615	athe55_01750	ath47_05032
hypothetical protein	amet25_05651	amet26_00671	arun53_02113	as41_06410	athe54_02614	athe55_01751	ath47_05031
hypothetical protein	amet25_05678	amet26_00698	arun53_02086	as41_06437	athe54_02587	athe55_01778	ath47_05004
hypothetical protein	amet25_05694	amet26_00714	arun53_02070	as41_06453	athe54_02571	athe55_06485	ath47_04987
hypothetical protein	amet25_05775	amet26_00795	arun53_06522	as41_03656	athe54_04237	athe55_06338	ath47_04906
hypothetical protein	amet25_05786	amet26_00806	arun53_06533	as41_03668	athe54_04248	athe55_06327	ath47_04895
Mercuric resistance operon regulatory protein	amet25_05833	amet26_00853	arun53_03859	as41_01805	athe54_03673	athe55_05074	ath47_04850
hypothetical protein	amet25_05837	amet26_00857	arun53_03855	as41_01809	athe54_03677	athe55_05070	ath47_04846
hypothetical protein	amet25_05876	amet26_00896	arun53_06359	as41_00078	athe54_05019	athe55_05568	ath47_04807
hypothetical protein	amet25_05898	amet26_00918	arun53_02973	as41_00505	athe54_04993	athe55_05542	ath47_04778
Glyoxalase-like domain protein	amet25_05967	amet26_00987	arun53_02900	as41_02654	athe54_02929	athe55_01002	ath47_04710
Aminoglycoside/hydroxyurea antibiotic resistance kinase	amet25_05978	amet26_00998	arun53_03704	as41_02644	athe54_02939	athe55_01012	ath47_04700
Arylmalonate decarboxylase	amet25_06103	amet26_01123	arun53_03774	as41_03895	athe54_04481	athe55_02587	ath47_04574
hypothetical protein	amet25_06144	amet26_01164	arun53_06130	as41_05960	athe54_06020	athe55_05670	ath47_04553
Glutamine transport ATP-binding protein GlnQ	amet25_06189	amet26_01209	arun53_05481	as41_06005	athe54_04595	athe55_05659	ath47_04509
hypothetical protein	amet25_06254	amet26_01274	arun53_03750	as41_06036	athe54_04618	athe55_05636	ath47_04383
hypothetical protein	amet25_06288	amet26_01309	arun53_03716	as41_06078	athe54_01575	athe55_03840	ath47_04336
Ribosomal large subunit pseudouridine synthase A	amet25_06290	amet26_01311	arun53_03715	as41_06079	athe54_01576	athe55_03841	ath47_04334
hypothetical protein	amet25_06293	amet26_01314	arun53_03713	as41_06080	athe54_01578	athe55_03843	ath47_04333
hypothetical protein	amet25_06323	amet26_01344	arun53_04388	as41_06109	athe54_01605	athe55_01586	ath47_04304
Phthiocerol synthesis polyketide synthase type I PpsC	amet25_06361	amet26_01382	arun53_04398	as41_06141	athe54_01615	athe55_01576	ath47_04271
Anti-sigma-B factor antagonist	amet25_06503	amet26_01524	arun53_06714	as41_00816	athe54_01933	athe55_00945	ath47_04134
hypothetical protein	amet25_06516	amet26_01537	arun53_06704	as41_00829	athe54_01923	athe55_00935	ath47_04121
hypothetical protein	amet25_06618	amet26_01639	arun53_02738	as41_05537	athe54_01818	athe55_00830	ath47_04013
Deazaflavin-dependent nitroreductase	amet25_06642	amet26_01663	arun53_02762	as41_05555	athe54_05111	athe55_04363	ath47_03990
Alpha/beta hydrolase family protein	amet25_06645	amet26_01666	arun53_02764	as41_05557	athe54_05109	athe55_04365	ath47_03988
hypothetical protein	amet25_06663	amet26_01684	arun53_02783	as41_05576	athe54_05090	athe55_04384	ath47_03958
Mycothiol acetyltransferase	amet25_06772	amet26_01793	arun53_06676	as41_00234	athe54_04787	athe55_04266	ath47_03854
serine-protein kinase RsbW	amet25_06808	amet26_01829	arun53_05019	as41_02835	athe54_05541	athe55_04950	ath47_03799
Demethylmenaquinone methyltransferase	amet25_06948	amet26_03298	arun53_00616	as41_03839	athe54_00348	athe55_00059	ath47_01835
hypothetical protein	amet25_06988	amet26_02926	arun53_01240	as41_03067	athe54_06273	athe55_05997	ath47_02384
hypothetical protein	amet25_06989	amet26_02927	arun53_01241	as41_03066	athe54_06272	athe55_05996	ath47_02383
4-oxalmesaconate hydratase	amet25_07010	amet26_02948	arun53_00575	as41_00337	athe54_02308	athe55_03578	ath47_02356
Transcriptional regulator KdgR	amet25_07027	amet26_02965	arun53_07021	as41_02962	athe54_07114	athe55_07035	ath47_02340
Streptomyces sporulation and cell division protein, SsgA	amet25_07074	amet26_03012	arun53_04275	as41_02914	athe54_02819	athe55_04654	ath47_02293
putative NUDIX hydrolase	amet25_07095	amet26_03033	arun53_05202	as41_02893	athe54_02795	athe55_04123	ath47_02271
hypothetical protein	amet25_07097	amet26_03035	arun53_05204	as41_02891	athe54_02793	athe55_04125	ath47_02269
hypothetical protein	amet25_07108	amet26_03046	arun53_05215	as41_00088	athe54_02782	athe55_04136	ath47_02258
hypothetical protein	amet25_07154	amet26_03092	arun53_05302	as41_05211	athe54_06332	athe55_06058	ath47_02201
hypothetical protein	amet25_07196	amet26_03134	arun53_01506	as41_05169	athe54_01388	athe55_03438	ath47_02158
hypothetical protein	amet25_07234	amet26_03172	arun53_00007	as41_05131	athe54_00700	athe55_03332	ath47_02122
